# Supplementary material for: Rapid translocation of NGR proteins driving polarization of PIN-activating D6 protein kinase during root gravitropism
Source: eLife. 2024 Mar 5;12:RP91523. doi: 10.7554/eLife.91523 (PMC10942638; doi:10.7554/eLife.91523)
Supplement: Figure 1—source data 1. [file elife-91523-fig1-data1.xlsx]

## Sheet: Figure 1A
FM4-64	NGR-GFP
1.14439	0.683684
0.89748	0.557472
0.628324	0.463927
0.853327	0.551908
0.812665	0.542474
1.06995	0.517581
1.24684	0.447918
1.17379	0.598929
0.623561	0.338913
1.00282	0.721194
	0.415045
	0.361722
	0.470018
	0.44746

## Sheet: Figure 1D
	bottom								top
0
0.25	1	1	1	1	1				1	1	1	1	1
0.5	0.981108	0.968592	0.91526	1.02568	0.985454				0.973577	1.02138	1.00521	0.999517	0.985368
0.75	0.986402	0.950808	0.99891	1.05293	1.01767				0.93738	1.04582	0.985078	0.934648	1.0119
1	1.00384	0.954335	1.05582	1.02162	1.0407				0.927044	0.991659	0.986507	0.95555	1.01927
1.25	1.02145	0.961746	1.13654	1.03906	1.09019				0.954739	0.89554	0.945045	0.916676	1.01352
1.5	1.01348	0.978681	1.13272	1.02221	1.05207				0.946281	0.90814	0.910246	0.885736	0.980898
1.75	0.974552	1.00861	1.13584	0.992022	1.11744				0.910781	0.955269	0.923391	0.912058	0.975109
2	1.02106	1.02283	1.06977	1.02478	1.09121				0.928756	0.907446	0.91497	0.897801	0.900449
2.25	1.01901	1.05494	1.12562	1.04815	1.06918				0.971072	0.898798	0.911029	0.920471	0.942129
2.5	1.04411	1.14145	1.13857	1.03476	1.10619				0.976159	0.855299	0.939753	0.902209	0.94559
2.75	1.03341	1.12048	1.15293	1.07079	1.18678				0.977951	0.791158	0.937448	0.887142	0.954114
3	1.06435	1.06682	1.09912	1.02332	1.12457				0.986016	0.763615	0.8801	0.886229	0.908939
3.25	1.07546	1.07124	1.23519	1.06586	1.1407				0.963119	0.742202	0.855232	0.862346	0.870303
3.5	0.999883	1.05089	1.16126	1.08159	1.17437				0.940681	0.759599	0.861721	0.86082	0.940688
3.75	1.04184	1.03994	1.24909	1.12226	1.20798				0.950573	0.659651	0.812789	0.888104	0.901699
4	1.05264	1.03729	1.20502	1.13661	1.28158				0.964679	0.692926	0.832731	0.868405	0.910449
4.25	1.04908	0.978796	1.15965	1.15881	1.17827				0.934047	0.693191	0.839527	0.885119	0.952016
4.5	1.06761	0.928192	1.17717	1.1227	1.23603				0.891288	0.674473	0.784958	0.895801	0.953492
4.75	1.07661	1.06294	1.30495	1.11382	1.27545				0.932844	0.729371	0.75395	0.868844	0.864715
5	1.12156	1.13332	1.40153	1.16078	1.25322				0.944488	0.77704	0.731876	0.868888	0.889386
5.25	1.08676	1.16381	1.40309	1.07539	1.25563				0.929676	0.745789	0.757205	0.856466	0.893709
5.5	1.11859	1.06625	1.36972	1.15573	1.25702				0.924496	0.714054	0.711077	0.860283	0.853799
5.75	1.16109	1.04492	1.4353	1.17604	1.23893				0.927625	0.690341	0.680117	0.751443	0.809565
6	1.12765	1.06941	1.33911	1.15105	1.27831				0.932552	0.695061	0.683242	0.784813	0.852961
6.25	1.15105	1.08375	1.39301	1.29176	1.26894				0.902443	0.732816	0.675755	0.806002	0.816163
6.5	1.15683	1.08517	1.39461	1.2349	1.25252				0.838045	0.716926	0.675245	0.825338	0.849329
6.75	1.20836	1.1158	1.46773	1.26762	1.26932				0.857533	0.726576	0.652525	0.816786	0.823315
7	1.20762	1.12714	1.6061	1.20442	1.29029				0.805214	0.788209	0.648508	0.854913	0.798095
7.25	1.15619	1.14757	1.52369	1.27444	1.32055				0.859255	0.733145	0.639499	0.810602	0.772684
7.5	1.17405	1.1923	1.62533	1.33777	1.3371				0.837355	0.770867	0.620898	0.713563	0.78165
7.75	1.21222	1.155	1.60111	1.26039	1.29427				0.805483	0.772011	0.628754	0.794286	0.751714
8	1.26167	1.1475	1.61294	1.26666	1.29452				0.793217	0.808962	0.622396	0.782607	0.760552
8.25	1.31249	1.17416	1.56105	1.29519	1.32793				0.785289	0.755329	0.619634	0.788773	0.777346
8.5	1.26132	1.15758	1.63116	1.26754	1.34904				0.798453	0.712877	0.619295	0.776888	0.767993
8.75	1.30236	1.20169	1.71471	1.32466	1.30695				0.801377	0.690572	0.61227	0.767047	0.770366
9	1.29676	1.25431	1.71129	1.35392	1.36427				0.795246	0.72092	0.633082	0.759981	0.74642
9.25	1.33585	1.24819	1.6233	1.40527	1.33584				0.76881	0.717256	0.628071	0.750033	0.790272
9.5	1.32612	1.26714	1.7328	1.35521	1.42065				0.763037	0.762669	0.656695	0.731552	0.749209
9.75	1.1962	1.25095	1.71253	1.31913	1.40714				0.781319	0.785458	0.647044	0.749322	0.752803
10	1.25586	1.27557	1.8339	1.29018	1.42462				0.789554	0.782641	0.649981	0.75535	0.742303
10.25		1.32801	1.77026	1.34369	1.4474					0.739088	0.644576	0.777886	0.742479
10.5		1.34819	1.89587	1.26105	1.44642					0.785282	0.623657	0.763499	0.741558
10.75		1.36668	1.8763	1.29397	1.38773					0.777755	0.640163	0.726406	0.75268
11		1.3177	1.98761	1.31269	1.46502					0.756056	0.641257	0.708555	0.784547
11.25		1.36336	2.05704	1.32034	1.44897					0.747121	0.666541	0.696768	0.773743
11.5		1.29684	1.94925	1.4213	1.41524					0.733861	0.638518	0.7167	0.774233
11.75		1.34919	1.96944	1.38697	1.3706					0.76696	0.645157	0.68098	0.793051
12		1.41915	2.05854	1.4684	1.43618					0.815388	0.678247	0.517318	0.817786
12.25		1.49499	1.94131	1.43347	1.44711					0.820384	0.662213	0.506363	0.773464
12.5		1.503	2.10412	1.57379	1.41346					0.828703	0.668353	0.592564	0.775194
12.75		1.49944	2.03527	1.50116	1.38436					0.831663	0.652579	0.493923	0.757479
13		1.49942	2.02782	1.47783	1.38493					0.838595	0.662453	0.513626	0.782478
13.25		1.48706	1.97875	1.44464	1.39288					0.797496	0.671006	0.651432	0.764003
13.5		1.4969	2.1534	1.48011						0.80521
13.75		1.5361	2.12072	1.43091						0.801028
14		1.54707	2.16158	1.48195						0.877637
14.25		1.53255	2.1138	1.54296						0.815311
14.5		1.50431	2.02547	1.55205						0.828087
14.75		1.50676	2.18954	1.47982						0.818535
15		1.53861	2.22761	1.60862						0.767643
15.25		1.51697	2.2331	1.67243						0.739022
15.5		1.51543	2.13539	1.61364						0.773431
15.75		1.51542	2.19428	1.58085						0.73286
16		1.51051	2.15645	1.59775						0.75424
16.25		1.51899	2.12512	1.63385						0.749288
16.5		1.49299	2.12313	1.67159						0.717685
16.75		1.55236	2.12275	1.63834						0.765431
17		1.58804	2.05732	1.64881						0.770185
17.25		1.53784	2.16718	1.68583						0.732837
17.5		1.48873	2.1825	1.56707						0.737228
17.75
18
18.25
18.5
18.75
19
19.25
19.5
19.75
20
20.25
20.5
20.75
21
21.25
21.5
21.75
22
22.25
22.5

## Sheet: Figure 1E
time (min)	bottom ctrl									top ctrl									time (min)	bottom NPA									top NPA
	flip1	flip2	flip3							flip1	flip2	flip3								flip1	flip2	flip3							flip1	flip2	flip3
0																			0
0.251833																			0.251833			1
0.503667	1	1								1.26477	1.11131								0.503667	1	1	0.990483									1.06846
0.7555	0.994663	0.995745								1.25767	1.08228								0.7555	1.00495	0.992923	0.979421							0.938188	0.997032	1.07979
1.00733	0.992925	0.996092	1							1.24661	1.05642	1.09948							1.00733	0.99996	0.998034	0.936802							0.920752	0.949968	1.06033
1.25917	0.97593	0.991483	1.00017							1.20599	1.04588	1.1118							1.25917	0.986527	1.06731	0.933763							0.942303	0.938039	1.025
1.511	0.981782	1.0127	0.991814							1.2004	1.05888	1.12841							1.511	0.96709	1.08076	0.940387							0.916166	0.938499	1.02238
1.76283	0.981	0.989816	0.993131							1.17577	1.06991	1.10008							1.76283	0.969761	1.00794	0.949963							0.904466	0.928493	0.99329
2.01467	0.979564	0.983777	0.98983							1.14775	1.05099	1.11984							2.01467	0.940783	0.957475	0.951579							0.904609	0.968262	0.964382
2.2665	0.971106	0.986323	0.990629							1.11216	1.05073	1.10192							2.2665	0.963996	0.948997	0.924214							0.911462	0.97717	0.965207
2.51833	0.977377	0.9893	0.991815							1.07375	1.08041	1.08686							2.51833	0.943316	0.947368	0.951661							0.909996	0.982024	0.961155
2.77017	0.978481	0.976444	0.981686							1.04201	1.05734	1.09619							2.77017	0.975361	0.979641	0.952586							0.902312	0.962662	0.96824
3.022	0.992408	0.981662	0.985292							1.01893	1.04401	1.06956							3.022	0.98988	0.98019	0.945124							0.907843	0.959675	0.951936
3.27383	1.00785	0.978956	0.984146							1.00807	0.978692	1.08776							3.27383	0.958645	0.985063	0.935243							0.923054	0.943898	0.957928
3.52567	1.03531	0.988612	0.977965							0.992509	0.978531	1.04386							3.52567	0.975979	1.00145	0.932727							0.899689	0.935794	0.979097
3.7775	1.09643	0.97484	0.998869							0.980259	0.953054	1.04757							3.7775	0.981664	0.994206	0.920992							0.91457	0.928092	1.0011
4.02933	1.17654	0.983529	0.998071							0.958826	0.940299	1.03076							4.02933	0.972039	1.00221	0.90486							0.925599	0.921663	0.97212
4.28117	1.21384	0.993142	0.999168							0.957446	0.938688	1.02214							4.28117	0.96578	0.967079	0.917689							0.906488	0.956953	0.999103
4.533	1.30356	0.985795	1.0346							0.966607	0.936427	1.01649							4.533	0.981687	0.968319	0.954837							0.917947	0.979696	1.01495
4.78483	1.32394	1.03792	1.07422							0.953205	0.904	1.00147							4.78483	1.00345	0.98219	0.932486							0.921541	0.959289	1.02063
5.03667	1.32485	1.05023	1.11263							0.948153	0.888907	0.997524							5.03667	0.980341	0.966151	0.948659							0.90722	0.935526	1.01631
5.2885	1.28967	1.06399	1.19657							0.938017	0.879263	0.984198							5.2885	0.98461	0.97278	0.956326							0.900432	0.952045	1.01171
5.54033	1.22916	1.09689	1.25433							0.950119	0.894488	0.990048							5.54033	0.983984	0.965275	0.941445							0.918508	0.946654	0.994121
5.79217	1.20548	1.11417	1.22902							0.929498	0.876919	0.992428							5.79217	0.946155	0.944595	0.937188							0.898275	0.941006	1.00571
6.044	1.16499	1.15269	1.21083							0.945045	0.890049	0.980741							6.044	0.974282	0.955546	0.938333							0.906805	0.958715	0.992357
6.29583	1.12103	1.18752	1.19835							0.935572	0.887884	0.988449							6.29583	0.968861	0.980291	0.950514							0.924956	0.974763	1.00036
6.54767	1.09031	1.16391	1.16929							0.932712	0.889669	0.980774							6.54767	0.986624	1.00934	0.941338							0.909826	0.966596	0.993622
6.7995	1.09839	1.10273	1.11671							0.92924	0.889357	0.985679							6.7995	0.988778	0.997593	0.915565							0.897949	0.931988	1.00314
7.05133	1.08694	1.1094	1.13069							0.92656	0.894549	0.977352							7.05133	0.963942	1.01684	0.942883							0.9311	0.927662	1.02168
7.30317	1.07803	1.11021	1.11148							0.931184	0.888796	0.984885							7.30317	0.978735	1.02282	0.933605							0.909378	0.937862	0.985478
7.555	1.08547	1.10462	1.12488							0.925438	0.888885	0.976796							7.555	0.98278	1.00603	0.923528							0.897478	0.921288	0.968992
7.80683	1.09162	1.11912	1.12915							0.926237	0.899094	1.00363							7.80683	0.970762	1.00881	0.920212							0.929459	0.930408	0.968471
8.05867	1.11264	1.11117	1.10765							0.935807	0.906601	0.980885							8.05867	0.973698	1.00571	0.924293							0.929419	0.941678	0.988523
8.3105	1.08727	1.11348	1.09441							0.937158	0.913969	0.974577							8.3105	0.976315	0.985745	0.928623							0.917682	0.939753	0.968983
8.56233	1.0883	1.11068	1.1106							0.929583	0.89736	0.984163							8.56233	0.97235	0.991849	0.919453							0.922175	0.960946	0.981385
8.81417	1.09107	1.10351	1.13662							0.929669	0.894871	0.973348							8.81417	0.979925	0.977885	0.922312							0.908091	0.956076	1.00459
9.066	1.13063	1.0837	1.10436							0.929247	0.907145	0.984406							9.066	0.987245	0.995369	0.933352							0.919819	0.92763	1.02013
9.31783	1.11566	1.0997	1.0946							0.930262	0.919838	0.991296							9.31783	0.987991	0.983154	0.953132							0.939711	0.926179	1.04157
9.56967	1.1237	1.08134	1.09144							0.922649	0.917151	0.975176							9.56967	0.971223	1.01726	0.998005							0.928232	0.938416	1.03637
9.8215	1.131	1.08527	1.12004							0.925332	0.904776	0.988782							9.8215	0.989063	0.988904	0.963331							0.925303	0.938943	1.01252
10.0733	1.10787	1.1087	1.10831							0.920021	0.914116	0.985954							10.0733	0.96046	0.950804	0.952973							0.910117	0.946432	1.00475
10.3252	1.12731	1.12298	1.08492							0.916241	0.913215	0.968268							10.3252	0.999935	0.985658	0.953287							0.899625	0.935382	0.979055
10.577	1.14984	1.15121	1.08778							0.923643	0.913955	0.995168							10.577	0.971049	1.0117	0.923564							0.916349	0.95993	0.980016
10.8288	1.11012	1.17442	1.13923							0.91706	0.914718	0.980392							10.8288	0.93848	1.0072	0.914157							0.903755	1.01045	0.985939
11.0807	1.09706	1.15931	1.12804							0.909178	0.902424	0.988985							11.0807	0.962055	0.993402	0.921631							0.922629	0.996396	0.982646
11.3325	1.08553	1.13634	1.10608							0.923338	0.905363	0.992808							11.3325	0.960101	1.00427	0.956311							0.910427	0.978971	0.978135
11.5843	1.06934	1.18055	1.10506							0.918956	0.906505	0.995007							11.5843	0.979333	0.979744	0.943039							0.900361	0.976715	0.957449
11.8362	1.05878	1.16925	1.10313							0.910538	0.912636	0.997689							11.8362	0.949023	0.975831	0.935075							0.908995	1.00916	0.959348
12.088	1.04806	1.13288	1.08583							0.90517	0.901928	0.988536							12.088	0.962106	0.973553	0.928849							0.896187	0.961585	0.96792
12.3398	1.05311	1.10133	1.04537							0.897977	0.901764	0.98939							12.3398	0.981577	0.959962	0.921949							0.902438	0.972106	0.978993
12.5917	1.03874	1.06572	1.06946							0.916746	0.896937	0.989786							12.5917	0.954597	0.960758	0.940576							0.908659	0.960335	0.984775
12.8435	1.05004	1.07228	1.08437							0.895106	0.884974	0.990665							12.8435	0.94961	0.963302	0.957343							0.908712	0.98295	0.990156
13.0953	1.03454	1.05336	1.06669							0.890324	0.897032	1.00767							13.0953	0.952088	0.953753	0.978791							0.907638	0.964289	1.008
13.3472	1.01186	1.06479	1.07138							0.892725	0.903271	0.993365							13.3472	0.960474	0.965725	0.965672							0.902186	0.969583	0.988736
13.599	1.01339	1.05937	1.08048							0.9099	0.901343	0.996427							13.599	0.966079	0.963951	0.97074							0.914272	0.974457	0.990072
13.8508	1.04549	1.0767	1.08667							0.916306	0.891923	0.991734							13.8508	0.958315	0.962769	0.955526							0.9293	1.00001	0.967694
14.1027	1.0006	1.07914	1.09166							0.897515	0.894544	1.00776							14.1027	0.955216	0.991622	0.956686							0.917317	0.99569	0.960547
14.3545	0.999735	1.12446	1.0898							0.90198	0.89569	0.997797							14.3545	0.949697	0.994452	0.921063							0.896209	0.987075	0.973498
14.6063	1.0018	1.14512	1.08744							0.899134	0.88907	1.00833							14.6063	0.972729	0.988581	0.919594							0.902573	0.981502	0.960185
14.8582	0.998847	1.1237	1.10852							0.892064	0.88648	1.0125							14.8582	0.980656	1.02256	0.929394							0.896052	0.974416	0.943397
15.11	0.980275	1.14517	1.09406							0.909391	0.900035	0.993776							15.11	0.985982	0.996623	0.93397							0.913118	1.01447	0.994376
15.3618	1.00497	1.09782	1.07513							0.896498	0.887144	1.00175							15.3618	0.998105	0.989562	0.932838							0.892811	0.998617	0.989452
15.6137	1.01228	1.07044	1.06696							0.902402	0.889536	1.00537							15.6137	0.954108	0.970124	0.95342							0.896787	0.97229	0.971371
15.8655	1.0093	1.09204	1.06604							0.908352	0.910876	0.986753							15.8655	0.951818	0.98304	0.950379							0.883273	0.970139	0.965732
16.1173	1.02054	1.11782	1.0659							0.900038	0.890021	0.994012							16.1173	0.985988	0.984028	0.937807							0.903024	0.977014	0.947825
16.3692	1.03222	1.10304	1.05302							0.896897	0.896616	1.00147							16.3692	0.983846	0.950276	0.926402							0.910139	0.9602	0.984981
16.621	1.01696	1.08827	1.06612							0.908786	0.900388	1.00189							16.621	0.974279	0.954127	0.918028							0.903545	0.974995	1.00407
16.8728	1.01006	1.0702	1.07197							0.899212	0.901204	1.01299							16.8728	0.945806	0.948259	0.907275							0.905181	0.984512	0.991954
17.1247	1.00461	1.05398	1.06021							0.902093	0.903509	0.99288							17.1247	0.962316	0.971627	0.911225							0.902263	0.972864	1.00538
17.3765	0.999678	1.07206	1.05178							0.890906	0.900496	1.00166							17.3765	0.97056	0.974918	0.90411							0.909928	0.948271	1.01538
17.6283	0.995783	1.07516	1.04817							0.890103	0.90108	1.00787							17.6283	0.962736	0.962882	0.930113							0.909893	0.949205	1.02811
17.8802	1.02089	1.05991	1.03859							0.894495	0.896787	0.996529							17.8802	0.965506	0.938403	0.926647							0.912064	0.946498	1.0273
18.132	1.04231	1.0987	1.07421							0.894602	0.90593	1.0148							18.132	0.968445	0.962993	0.935032							0.905007	0.967791	1.01761
18.3838	1.04123	1.10388	1.05206							0.914195	0.892781	1.02034							18.3838	0.991268	0.970518	0.956198							0.900415	0.962732	1.01255
18.6357	1.01069	1.0707	1.07132							0.897872	0.898567	1.00196							18.6357	0.969343	0.952252	0.939841							0.902482	0.971026	0.989575
18.8875	1.01017	1.05595	1.04788							0.902388	0.918652	1.0006							18.8875	0.951979	0.956751	0.920077							0.897562	0.954059	0.986218
19.1393	1.00634	1.05653	1.05464							0.903387	0.893877	1.00406							19.1393	0.965888	0.957686	0.948075							0.886014	0.960817	0.999243
19.3912	1.00817	1.07088	1.03558							0.895256	0.905252	1.0136							19.3912	0.947684	0.962013	0.928868							0.904447	0.935099	0.979378
19.643	0.997066	1.07789	1.04069							0.900404	0.897409	1.00803							19.643	0.966198	0.960669	0.924442							0.919003	0.954264	1.00398
19.8948	0.994672	1.0878	1.05805							0.899265	0.903628	1.00764							19.8948	0.963967	0.954507	0.957093							0.890211	0.940123	0.992079
20.1467	0.981261	1.06894	1.11445							0.897382	0.895225	1.01737							20.1467	0.971355	0.970322	0.94368							0.896676	0.936995	1.02832
20.3985	0.992213	1.06308	1.07969							0.889417	0.906001	1.02068							20.3985	0.967909	0.993556	0.941018							0.906617	0.908099	0.988009
20.6503	1.00905	1.07208	1.04416							0.902333	0.895606	1.03144							20.6503	0.96507	1.01002	0.936373							0.90144	0.931423	0.993426
20.9022	0.978706	1.0374	1.11376							0.892225	0.897081	1.02197							20.9022	0.960301	1.02632	0.946102							0.947311	0.952996	0.983387
21.154	1.00141	1.05358	1.08651							0.897688	0.896555	1.01955							21.154	0.977343	1.00492	0.954925							0.94909	0.999321	1.00519
21.4058	1.01244	1.08565	1.05529							0.897364	0.899811	1.01815							21.4058	0.961786	0.971301	0.954065							0.904539	0.966111	0.978271
21.6577	1.00418	1.08408	1.04314							0.902086	0.908543	1.01745							21.6577	0.965458	0.973874	0.972132							0.88625	0.960237	0.987474
21.9095	1.02391	1.07144	1.06167							0.894944	0.901612	1.01865							21.9095	0.997238	1.00005	0.952558							0.919146	0.954798	0.979677
22.1613	0.996077	1.06588	1.06932							0.892376	0.904566	1.0223							22.1613	0.973634	1.00713	0.931813							0.916932	0.941518	1.00814
22.4132	0.982065	1.01977	1.08039							0.893666	0.932821	1.02187							22.4132	1.01462	1.01185	0.965711							0.878474	0.923467	0.994386
22.665	0.984105	1.0672	1.05924							0.894343	0.926541	1.02138							22.665	0.995266	0.979805	0.969765							0.903576	0.974548	1.01724
22.9168	0.979841	1.04839	1.03177							0.910973	0.934724	1.01255							22.9168	0.987976	0.966403	0.953037							0.915782	0.950811	0.995463
23.1687	0.982482	1.02413	1.04445							0.909255	0.924397	1.01885							23.1687	0.9651	0.956235	0.951797							0.905725	0.941122	0.990646
23.4205	0.973077	1.03608	1.05875							0.907649	0.935475	1.02767							23.4205	0.96256	0.94845	0.951165							0.918646	0.982268	1.00416
23.6723	0.993989	1.0279	1.04858							0.895794	0.939002	1.02815							23.6723	0.970594	0.962142	0.939211							0.905046	0.958441	0.97783
23.9242	0.984073	1.01202	1.08231							0.904374	0.927117	1.01535							23.9242	0.969348	0.962048	0.960253							0.900489	0.97393	0.968549
24.176	0.988948	1.04074	1.09625							0.896901	0.935154	1.02806							24.176	0.960079	0.946738	0.953475							0.926454	0.974586	0.996308
24.4278	0.981765	1.03313	1.09338							0.903033	0.928099	1.02927							24.4278	0.955295	0.966593	0.936226							0.886401	0.957686	1.01334
24.6797	0.98662	1.01208	1.06281							0.904817	0.926814	1.03361							24.6797	0.961497	0.981507	0.940334							0.903362	0.956965	0.96959
24.9315	0.967667	1.00565	1.05839							0.900555	0.931496	1.0383							24.9315	0.968549	0.965383	0.92926							1.03837	0.979041	0.984913
25.1833	0.973705	1.01102	1.06887							0.891907	0.927082	1.03678							25.1833	0.961751	0.969532	0.920875							0.922668	0.999211	1.00741
25.4352	0.97742	1.02029	1.04551							0.895556	0.923957	1.02248							25.4352	0.956394	0.963342	0.919651							0.928227	1.01143	1.00142
25.687	0.973897	1.00687	1.03127							0.897655	0.94187	1.02355							25.687	0.98774	0.962119	0.90614							0.922279	0.974637	1.003
25.9388	0.972906	1.00516	1.03193							0.89565	0.935615	1.03143							25.9388	0.970934	0.951459	0.928782							0.925408	0.985808	1.00505
26.1907	0.976631	0.991547	1.00245							0.889347	0.931995	1.03717							26.1907	0.97552	0.965384	0.899634							0.921321	0.935671	1.03801
26.4425	0.965815	0.990713	1.00154							0.893215	0.919091	1.02859							26.4425	0.969281	0.956531	0.890804							0.908213	0.927114	0.992373
26.6943	1.00214	0.996676	1.02304							0.896743	0.92733	1.03767							26.6943	0.976427	0.98418	0.902493							0.90641	0.926257	0.964405
26.9462	0.993682	1.03792	1.04769							0.891186	0.924261	1.03246							26.9462	0.982421	0.981559	0.897099							0.936886	0.91418	0.989208
27.198	0.983473	1.03523	1.03497							0.898142	0.929265	1.02735							27.198	0.993989	0.986965	0.908455							0.912783	0.929319	0.924999
27.4498	0.971288	1.02443	1.02587							0.89548	0.933771	1.04415							27.4498	0.996338	0.998537	0.882556							0.899064	0.928014	0.930158
27.7017	0.982787	1.01926	1.04352							0.894216	0.931699	1.0395							27.7017	1.0074	0.988627	0.87096							0.919531	0.918825	0.92896
27.9535	0.966103	1.0314	1.05469							0.892328	0.927875	1.03679							27.9535	0.972817	0.951096	0.864117							0.897897	0.917697	0.92061
28.2053	0.968703	1.03473	1.06043							0.90314	0.926858	1.03785							28.2053	0.987382	0.974661	0.840024							0.904916	0.915477	0.902795
	0.983295	1.03994	1.05519							0.891384	0.919989	1.02112								0.975247	0.982111	0.853966							0.903662	0.923788	0.932245
		1.03397	1.0353								0.930909	1.04145								0.960829	0.963007	0.858886							0.883413	0.905775	0.934018
		1.0368	1.04002								0.932606	1.02683								0.978713	0.960649	0.858315							0.892438	0.928056	0.920652
		1.04669	1.04589								0.931282	1.03843								0.970219	0.964271	0.84987							0.933691	0.926312	0.934229
		1.04224	1.07238								0.933693	1.03711								0.975694	0.951867	0.858691							0.926555	0.913267	0.918484
		1.0249	1.04347								0.931411	1.04842								0.978795	0.964554	0.851633							0.916053	0.94137	0.918588
		0.999782	1.06765								0.920502	1.0321								0.981446	0.943566	0.856399							0.932092	0.941416	0.934967
		1.00732	1.0267								0.940075	1.05151								0.972427	0.942242	0.88326							0.936007	0.929051	0.903609
		1.00093	1.02002								0.933419	1.03072								1.01192	0.956184	0.846942							0.91858	0.921313	0.909191
		1.00677	1.02456								0.932853	1.04935								0.977306	0.965622	0.847413							0.919777	0.941408	0.910405
		1.01228	1.01806								0.943988	1.03414								0.961477	0.960284	0.849934							0.889234	0.933929	0.877513
		1.01867	1.02624								0.91625	1.04229								0.979996	0.947899	0.848061							0.898483	0.958879	0.88659
		1.01685	1.01907								0.924212	1.02534								0.9996	0.973038	0.836579							0.887606	0.979266	0.902938
		1.01764	1.01781								0.927673	1.03187								1.04442	1.00293	0.847374							0.897419	0.955541	0.910889
		1.0329	1.01943								0.936507	1.0469								1.00837	0.972349	0.852101							0.886702	0.972964	0.902167
		1.03295	1.03292								0.931555	1.05267								1.02075	0.983729	0.834201							0.895149	0.965889	0.924277
		0.990064	1.05202								0.932391	1.03597								0.991525	0.965933	0.827382							0.883001	0.938894	0.942956
		1.01708	1.08188								0.936297	1.03785								1.01382	0.964064	0.838112							0.872478	0.930434	0.925254
		1.00956	1.06729								0.927815	1.04087								0.988981	0.956258	0.857641							0.875722	0.94736	0.908523
		1.04406	1.07026								0.925651	1.03545								1.00967	0.971865	0.841562							0.875803	0.958362	0.894573
		1.05429	1.0511								0.924207	1.04003								1.00858	0.966665	0.868484							0.884866	0.959047	0.890403
		1.04816	1.02896								0.930588	1.05962								1.01144	0.96362	0.860203							0.896267	0.953843	0.902427
		1.0583	1.06565								0.944762	1.05806								1.05697	0.956112	0.839898							0.904099	0.956586	0.870777
		1.02893	1.04493								0.957795	1.0461								1.09858	0.981998	0.846518							0.914373	0.95344	0.921921
		1.00412	1.03087								0.943566	1.04664								1.0577	0.983929	0.871709							0.907451	0.932202	0.91076
		0.998001	1.03304								0.964704	1.03298								1.04853	0.967555	0.849998							0.902596	0.952014	0.913875
		0.975876	1.0366								0.958483	1.04489								1.06158	0.975229	0.852021							0.915035	0.932954	0.877204
		0.99825	1.01895								0.960504	1.04906								1.01785	0.963614	0.83936							0.900923	0.939547	0.864717
		1.00231	1.01951								0.951197	1.04957								0.984801	0.973354	0.832045							0.901013	0.936551	0.855926
		1.03281	1.01739								0.956304	1.04741								1.00475	0.961152	0.820473							0.886292	0.91913	0.856285
		1.01137									0.960245									0.994736	0.963672	0.838427							0.881508	0.902431	0.859766
		1.0144									0.951124									1.00715	0.97864	0.826919							0.907791	0.927173	0.875261
		1.01879									0.954983									0.985781	0.96695	0.838136							0.901849	0.938878	0.866364
		1.02289									0.949705									0.967569	0.956159	0.815027							0.887433	0.959097	0.873131
		0.998813									0.951919									0.977581	1.00499	0.826261							0.888017	0.958267	0.893929
		0.994975									0.965146									0.985835	0.976723	0.829265							0.886331	0.997164	0.921412
		0.987426									0.956619									0.973429	0.974293	0.831192							0.874528	0.986877	0.888164
		0.984631									0.963337									0.966587	0.987955	0.824028							0.894943	0.973431	0.877848
		0.990793									0.950677									0.982408	0.989116	0.824118							0.889012	0.973722	0.867036
		0.998563									0.956481									1.00423	0.988899	0.816854							0.888377	0.980721	0.858173
		1.00169									0.951236									1.00417	0.948497	0.831976							0.898256	0.960359	0.872594
		0.992324									0.947327									1.01192	0.965566	0.823339							0.873825	0.942549	0.897462
		0.988613									0.949527									0.99021	0.958532	0.817332							0.884361	0.924692	0.87946
		0.985183									0.953977									0.980593	0.935226	0.815267							0.873603	0.929614	0.879259
		1.00466									0.96068									1.01511	0.936924	0.821125							0.883386	0.92479	0.891706
		1.00143									0.950111									1.01829	0.948594	0.804388							0.876604	0.932993	0.904206
																				0.992739	0.972752	0.817936							0.875578	0.962591	0.933002
																						0.808444							0.89431	0.969835	0.863568
																						0.800507									0.852801
																						0.81098									0.833017
																						0.812844									0.842188
																						0.808588									0.851539
																						0.78919									0.846096
																						0.80277									0.860664
																						0.815928									0.870304
																						0.803061									0.855282
																						0.795486									0.88038
																						0.80141									0.849048
																						0.807737									0.851332
																						0.814503									0.842719
																						0.822551									0.846676
																						0.827113									0.85507
																						0.820956									0.868557
																						0.812065									0.873047
																						0.813352									0.898258
																						0.808612									0.887361
																						0.825993									0.856002
																						0.827579									0.888571
																						0.810832									0.878982
																						0.81534									0.859453
																						0.838774									0.865764
																						0.810473									0.84892
																						0.818386									0.847247
																						0.812003									0.832264
																						0.821694									0.85766
																						0.814264									0.879945
																						0.798739									0.871039
																						0.795714									0.876876
																						0.814794									0.871727
																						0.822024									0.908724
																						0.814773									0.863027
																						0.812885									0.862255
																						0.803628									0.887149
																						0.801									0.917142
																						0.810753									0.880342
																						0.809461									0.84517
																						0.799369									0.83975
																						0.807343									0.868074
																						0.810003									0.844567
																						0.792193									0.838701
																						0.800321									0.842187
																						0.793564									0.836991
																						0.796574									0.816322
																						0.816839									0.81457
																						0.809846									0.815009
																						0.828542									0.831959
																						0.827779									0.826539
																						0.81645									0.825345
																						0.822475									0.860467
																						0.80549									0.85919
																						0.800895									0.867832
																						0.796355									0.862528
																						0.804833									0.887242
																						0.830447									0.850443
																						0.819065									0.835233
																						0.81789									0.855855
																						0.80608									0.851983
																						0.809001									0.837488
																						0.802201									0.851726
																						0.799707									0.839166
																						0.79767									0.841241
																						0.801985									0.840461
																						0.808507									0.838694
																						0.826316									0.862499
																						0.821093									0.840968
																						0.818463									0.84166
																						0.852214									0.868242
																						0.828351									0.875262
																						0.821261									0.84277
																						0.808978									0.830222
																						0.818168									0.831425
																						0.814027									0.835619
																						0.803928									0.839495
																						0.811822									0.834207
																						0.801306									0.827063
																						0.802907									0.846302
																						0.79138									0.822925
																						0.799366									0.855032
																						0.803713									0.853822
																						0.791637									0.8581
																						0.81254									0.837717
																						0.807716									0.834268
																						0.812474									0.83825
																						0.79431									0.837309
																						0.804623									0.840176
																						0.813426									0.848113
																						0.801045									0.844809
																						0.810654									0.852983
																															0.85216

## Sheet: Figure 1F
	PIN3 bottom raw					PIN3 bottom normalized
1	45520.4	11330.7	19715.2	30376.5		1	1	1	1	1
3	44976.1	11851.5	20496.5	29219.7		1.04596	0.988042	1.11473	0.961918	0.961918
6	44740.9	11633.5	21095.7	30389.9		1.02672	0.982875	1.06696	1.00044	1.00044
9	42021.4	11379	20756.3	30758.8		1.00426	0.923133	1.04427	1.01259	1.01259
12	43197.6	9972.38	21721.6	29269.3		0.880122	0.948971	1.04562	0.96355	0.96355
15	43615.6	10550.2	23138.5	30708.4		0.931118	0.958153	1.08379	1.01093	1.01093
18	42807.1	11124.8	21140.7	32460.9		0.98183	0.940393	1.23906	1.06862	1.06862
21	44744.1	11961.4	23894.6	34406.4		1.05567	0.982945	1.2105	1.13266	1.13266
24	46333.8	11562.9	22470	32137.3		1.0205	1.01787	1.3478	1.05797	1.05797
27	46883.9	12672.2	23202.6	32638.3		1.1184	1.02995	1.3061	1.07446	1.07446
30	49282.6	12799.4	23286.2	33164.8		1.12962	1.08265	1.26138	1.09179	1.09179
33	49369.2	12285	22261.2	34154.3		1.08422	1.08455	1.23115	1.12437	1.12437

## Sheet: Figure 1G
	time(min)	bottom				top
	1
	2
	3
	4	1	1	1		0.613623	0.529769	0.706198
	5	1.00185	0.998749	1.01179		0.623143	0.541605	0.707711
	6	0.999818	1.00049	1.00477		0.652693	0.568963	0.707748
	7	0.995941	0.989989	0.997051		0.63814	0.55462	0.714779
	8	0.991448	0.979442	0.998306		0.654844	0.567095	0.727253
	9	0.98529	0.985317	0.979924		0.658986	0.583758	0.759343
	10	0.959768	0.943053	0.991698		0.684934	0.597606	0.754287
	11	0.965612	0.941741	1.01725		0.677551	0.591724	0.742893
	12	0.968517	0.94616	1.0206		0.699552	0.615358	0.763861
	13	0.949431	0.935636	1.02036		0.707911	0.617546	0.775235
	14	0.949719	0.931694	0.997739		0.714895	0.627913	0.782041
	15	0.939929	0.917187	1.02021		0.714107	0.634079	0.799703
	16	0.934207	0.916513	1.01155		0.740196	0.655609	0.798302
	17	0.91569	0.901856	0.99304		0.745364	0.657685	0.8143
	18	0.925624	0.903364	1.00155		0.751964	0.671891	0.803324
	19	0.903628	0.878186	0.987299		0.765095	0.678687	0.825898
	20	0.909781	0.884151	0.963688		0.767325	0.682236	0.830768
	21	0.912106	0.886077	0.978678		0.786752	0.724009	0.849967
	22	0.902446	0.880574	0.970582		0.793287	0.71448	0.839563
	23	0.900679	0.867962	0.981635		0.788727	0.713719	0.860213
	24	0.89087	0.856866	0.986827		0.807284	0.730673	0.86579
	25	0.884074	0.837806	0.979072		0.820092	0.740118	0.882768
	26	0.887021	0.84429	0.981981		0.831408	0.764258	0.872198
	27	0.859105	0.834391	0.985523		0.834816	0.767496	0.888179
	28	0.867647	0.836694	0.982009		0.848146	0.763868	0.891794
	29	0.858916	0.827884	0.963803		0.836598	0.760305	0.90252
	30	0.849179	0.820391	0.989583		0.850438	0.779306	0.901792
	31	0.833281	0.810373	0.956355		0.839774	0.77406	0.900396
	32	0.847234	0.813677	0.943354		0.856569	0.781672	0.903208
	33	0.84385	0.806198	0.957946		0.873206	0.8097	0.916552
	34	0.838683	0.798999	0.955172		0.893896	0.820336	0.945981
	35	0.823454	0.782941	0.952252		0.880245	0.820516	0.920549
	36	0.829648	0.786732	0.964688		0.880977	0.821986	0.938407
	37	0.818203	0.77665	0.967253		0.892906	0.834674	0.937232
	38	0.826357	0.780939	0.92646		0.897249	0.845275	0.939223
	39	0.803435	0.755729	0.952494		0.899695	0.854081	0.946064
	40	0.79909	0.753284	0.939606		0.898104	0.840586	0.955733
	41	0.794361	0.744563	0.959636		0.902759	0.86276	0.953123
	42	0.790898	0.74446	0.951046		0.906675	0.861824	0.96497
	43	0.780542	0.731488	0.927984		0.904556	0.851944	0.976839
	44	0.782081	0.735609	0.940401		0.921665	0.879912	0.958536
	45	0.772856	0.713305	0.92443		0.908158	0.872218	0.965413
	46	0.774265	0.717304	0.935116		0.907328	0.869092	0.976304
	47	0.776069	0.733243	0.932809		0.933179	0.895768	0.975525
	48	0.761283	0.702436	0.944116		0.930041	0.884712	0.975476
	49	0.753496	0.709025	0.90876		0.948381	0.900482	0.977566
	50	0.757902	0.706807	0.938103		0.930247	0.903356	0.957063
	51	0.753908	0.701619	0.935228		0.964378	0.932992	0.990727
	52	0.760911	0.703541	0.933175		0.9574	0.936241	0.966807
	53	0.744853	0.694995	0.953788		0.96266	0.936368	1.00365
	54	0.743967	0.68275	0.960526		0.950465	0.928655	1.00617
	55	0.744362	0.691743	0.938617		0.974695	0.963327	1.00151
	56	0.749801	0.696829	0.955386		0.958677	0.935926	0.995955
	57	0.752816	0.69682	0.950571		0.977632	0.951908	1.01933
	58	0.73997	0.678482	0.953225		0.988797	0.964716	1.00938
	59	0.735482	0.672797	0.947785		0.9768	0.966701	0.990402
	60	0.728344	0.672388	0.933916		0.987365	0.97731	0.977833
	61	0.723784	0.665362	0.960164		0.979138	0.963128	0.985986
	62	0.717277	0.655171	0.956862		0.978504	0.980922	0.990438
	63	0.728385	0.673621	0.956046		1.0008	0.990195	1.00663
	64	0.721834	0.664683	0.935139		1.01156	1.00287	1
	65	0.726255	0.670074	0.953888		1	1	0.990904
	66	0.726531	0.670526	0.965759		1.00094	0.994697	1.00527
	67	0.720667	0.667415	0.952514		0.989684	0.996336	0.992444
	68	0.716393	0.653402	0.952566		1.03463	1.02183	1.00135
	69	0.73686	0.68144	0.950141		1.0318	1.01561	0.975867
	70	0.709656	0.65013	0.968103		1.03208	1.02962	1.00154
	71	0.719674	0.662632	0.942431		1.03383	1.04195	0.983779
	72	0.723	0.658073	0.949958		1.03798	1.03752	0.989254
	73	0.717704	0.672552	0.953977		1.04625	1.05091	0.9784
	74	0.717534	0.661393	0.928741		1.04751	1.04854	0.970834
	75	0.716095	0.657099	0.925821		1.04806	1.05257	0.959719
	76	0.711584	0.659408	0.935326		1.05652	1.05783	0.967659
	77	0.715996	0.660986	0.937593		1.07601	1.06488	0.959303
	78	0.713709	0.652012	0.920368		1.05479	1.06396	0.955204
	79	0.714579	0.650921	0.920833		1.07582	1.08502	0.954201
	80	0.709141	0.654594	0.921487		1.07577	1.07782	0.936553
	81	0.712202	0.654104	0.916829		1.08519	1.09424	0.94846
	82	0.712549	0.659372	0.910305		1.08865	1.08759	0.938391
	83	0.723494	0.664953	0.927545		1.10004	1.10186	0.945138
	84	0.709235	0.656428	0.92756		1.11377	1.12481	0.947288
	85	0.723135	0.673583	0.919071		1.11717	1.11627	0.899556
	86	0.728385	0.669645	0.920147		1.13299	1.13048	0.90068
	87	0.723557	0.672532	0.900704		1.1318	1.13511	0.909633
	88	0.707249	0.6489	0.907614		1.14047	1.13771	0.905006
	89	0.713603	0.653667	0.902623		1.1364	1.12875	0.90384
	90	0.713432	0.664885	0.897608		1.14285	1.14513	0.896099
	91	0.711238	0.667397	0.910497		1.17325	1.17425	0.896736
	92	0.718853	0.672024	0.919372		1.16582	1.17498	0.894628
	93	0.7151	0.669508	0.910438		1.16487	1.17897	0.906527
	94	0.718415	0.671983	0.90256		1.17197	1.17223	0.894256
	95	0.723069	0.672867	0.912517		1.18489	1.18434	0.869288
	96	0.716478	0.666708	0.907744		1.1863	1.1863	0.884924
	97	0.715938	0.666826	0.89023		1.1987	1.19943	0.852071
	98	0.712445	0.66572	0.884558		1.1991	1.19949	0.852561
	99	0.729133	0.680962	0.911856		1.1902	1.18098	0.847789
	100	0.724007	0.675231	0.896528		1.21264	1.21701	0.865366
	101	0.719693	0.676205	0.896546		1.21615	1.21391	0.844281
	102	0.72398	0.685824	0.906848		1.21372	1.20401	0.877385
	103	0.717335	0.672247	0.902225		1.22298	1.21625	0.861792
	104	0.738545	0.69602			1.24304	1.24005	1.18725
	105	0.729452	0.682758			1.23089	1.22324	1.18182
	106	0.729368	0.690809			1.24963	1.24688	1.18212
	107	0.733216	0.696356			1.25352	1.24325	1.2282
	108	0.739926	0.702206			1.26428	1.25449	1.2377
	109	0.745836	0.708385			1.26939	1.25944	1.21709
	110	0.733921	0.710029			1.26898	1.25425	1.23695
	111	0.726331	0.693789			1.24828	1.2546	1.24376
	112	0.732661	0.703075			1.27748	1.27773	1.22579
	113	0.730171	0.70289			1.27424	1.26252	1.2699
	114	0.747169	0.724078			1.28268	1.26858	1.23527
	115	0.727649	0.704418			1.27913	1.27061	1.2444
	116	0.730848	0.705021			1.27664	1.26987	1.26578
	117	0.738279	0.717352			1.29127	1.28229	1.25685
	118	0.745458	0.717092			1.30899	1.29241	1.27485
	119	0.752005	0.726402			1.2865	1.26185	1.3142
	120	0.745786	0.73779			1.30019	1.2819	1.30823
	121	0.748118	0.730604			1.30706	1.29383	1.29896
	122	0.735855	0.726952			1.28791	1.25346	1.32316
	123	0.744861	0.72339			1.3054	1.27171	1.32246
	124	0.746629	0.723322			1.29578	1.25496	1.30443
	125	0.744381	0.738534			1.32341	1.27894	1.31182
	126	0.753504	0.753103			1.3072	1.25462	1.32813
	127	0.74598	0.748462			1.32092	1.25203	1.31607
	128	0.737566	0.743262			1.30532	1.25845	1.35821
	129	0.747175	0.751481			1.29886	1.24102	1.32792
	130	0.747895	0.749633			1.3264	1.26497	1.32408
	131	0.74173	0.739375			1.31426	1.25012	1.33401
	132	0.76301	0.764415			1.30035	1.2329	1.32444
	133	0.760659	0.772886			1.32877	1.27286	1.35502
	134	0.75797	0.766327			1.3168	1.26059	1.34266
	135	0.749758	0.757826			1.31844	1.26675	1.39624
	136	0.742828	0.750861			1.32267	1.26508	1.37955
	137	0.757777	0.769938			1.32429	1.23202	1.37665
	138	0.741342	0.745645			1.33462	1.26644	1.37326
	139	0.736125	0.759086			1.34582	1.29293	1.39599
	140	0.745756	0.764477			1.33424	1.25574	1.40247
	141	0.733319	0.762712			1.32621	1.25242	1.41322
	142	0.728907	0.756108			1.33096	1.26939	1.38485
	143	0.712744	0.743003			1.33938	1.30413	1.40092
	144	0.717099	0.752099			1.33422	1.28014
	145	0.709231	0.739798			1.34371	1.3132
	146	0.709445	0.74653			1.34338	1.33649
	147	0.718796	0.75815			1.35703	1.33379
	148	0.710901	0.74988			1.33278	1.30197
	149	0.729048	0.765707			1.35755	1.3223
	150	0.713319	0.759801			1.33986	1.32991
	151	0.70315	0.748232			1.33303	1.32277
	152	0.695518	0.740666			1.34444	1.35744
	153	0.689363	0.730012			1.33366	1.34972
	154	0.682966	0.726149			1.3598	1.39148
	155	0.674982	0.72456			1.36559	1.40859
	156	0.667767	0.710588			1.35797	1.39762
	157	0.675364	0.703124			1.35889	1.40878
	158	0.67196	0.709187			1.36678	1.42415
	159	0.673261	0.713162			1.3767	1.42895
	160	0.67118	0.694789			1.35215	1.40929
	161	0.669739	0.709886			1.3578	1.41647
	162	0.6703	0.698284			1.37306	1.44932
	163	0.662519	0.687624			1.36155	1.4519
	164	0.644877	0.673509			1.33666	1.42756
	165	0.648059	0.671459			1.3446	1.4565
	166	0.633929	0.656468			1.3176	1.44372
	167	0.636829	0.656882			1.32369	1.45727
	168	0.634209	0.645457			1.32799	1.46661
	169	0.622558	0.634815			1.31057	1.46009
	170	0.618101	0.624918			1.31749	1.47461
	171	0.621289	0.629817			1.31921	1.50762
	172	0.620398	0.628115			1.30537	1.48813
	173	0.631077	0.64168			1.32017	1.48409
	174	0.620313	0.621092			1.32824	1.48896
	175	0.615321	0.610198			1.30649	1.47257
	176	0.617994	0.614201			1.29334	1.46772
	177	0.615997	0.610708			1.30031	1.48729
	178	0.600843	0.590437			1.27314	1.45994
	179	0.61967	0.608439			1.30677	1.48662
	180	0.601603	0.585698			1.30605	1.48745
	181	0.600013	0.588456			1.30346	1.4882
	182	0.598691	0.576686			1.2924	1.49206
	183	0.598033	0.574425			1.27525	1.48177
	184	0.601352	0.57604			1.27836	1.46322
	185	0.601884	0.577367			1.27171	1.46146
	186	0.600789	0.571038			1.28226	1.47102
	187	0.598856	0.565212			1.24695	1.42823
	188	0.602359	0.567571			1.25139	1.4378
	189	0.598338	0.563515			1.24036	1.42126
	190	0.595375	0.557045			1.21279	1.3975
	191	0.595885	0.562016			1.22982	1.42508
	192	0.59005	0.554508			1.20879	1.38768
	193	0.59258	0.553			1.22024	1.38254
	194	0.593123	0.553705			1.20959	1.37582
	195	0.579001	0.539544			1.18333	1.34456
	196	0.579643	0.535148			1.17295	1.32224
	197	0.57867	0.533883			1.16972	1.30184
	198	0.577619	0.537134			1.15579	1.27138
	199	0.572701	0.527548			1.14715	1.27258
	200	0.58322	0.538857			1.15702	1.27134
	201	0.588722	0.540513			1.13741	1.27007
	202	0.589871	0.537366			1.16111	1.2881
	203	0.579196	0.532767			1.13726	1.24858
	204	0.58318	0.531525			1.14957	1.27529
	205	0.590058	0.530848			1.14593	1.25101
	206	0.583284	0.526076			1.12008	1.24751
	207	0.579729	0.527106			1.13095	1.23447
	208	0.586619	0.528664			1.13096	1.2373
	209	0.590235	0.532247			1.1424	1.24896
	210	0.587639	0.524895			1.13098	1.24497
	211	0.583124	0.525347			1.11898	1.23639
	212	0.583769	0.520922			1.11771	1.22002
	213	0.578062	0.521771			1.11106	1.23269
	214	0.576409	0.516429			1.11088	1.22668
	215	0.578025	0.518467			1.10335	1.21136
	216	0.58242	0.517281			1.10028	1.2235
	217	0.578433	0.516252			1.08123	1.19072
	218	0.572489	0.511018			1.07737	1.17665
	219	0.570524	0.510053			1.08515	1.18166
	220	0.563785	0.504043			1.0868	1.1766
	221	0.570949	0.510223			1.06662	1.16293
	222	0.568518	0.50338			1.04962	1.14581
	223	0.569957	0.506463			1.05559	1.15143
	224	0.564115	0.501423			1.05168	1.13933
	225	0.566127	0.505553			1.0679	1.15437
	226	0.56374	0.498792			1.04296	1.13483
	227	0.557975	0.494917			1.04849	1.13324
	228	0.563557	0.496501			1.04265	1.12751
	229	0.563637	0.500489			1.04078	1.14023
	230	0.563458	0.499708			1.02312	1.116
	231	0.551129	0.490711			1.03131	1.11338
	232	0.556563	0.494869			1.01522	1.10811
	233	0.551676	0.487315			1.01598	1.10843
	234	0.55488	0.490474			1.02675	1.10752
	235	0.553866	0.48981			1.01266	1.09733
	236	0.54556	0.482011			0.999405	1.07915
	237	0.560937	0.495597			1.02085	1.0956
	238	0.552384	0.487981			1.00194	1.06938
	239	0.554541	0.491707			1.09135	1.10186
	240	0.553676	0.490852			1.08613	1.1059
	241	0.556739	0.491481			1.09689	1.10397
	242	0.563131	0.498772			1.07267	1.07286
		0.548999	0.489327			1.07151	1.08674
		0.564023	0.497178				1.09078
		0.554351	0.49137				1.09685
