# Supplementary material for: Rapid translocation of NGR proteins driving polarization of PIN-activating D6 protein kinase during root gravitropism
Source: eLife. 2024 Mar 5;12:RP91523. doi: 10.7554/eLife.91523 (PMC10942638; doi:10.7554/eLife.91523)
Supplement: Figure 2—figure supplement 1—source data 1. [file elife-91523-fig2-figsupp1-data1.xlsx]

## Sheet: Figure2-figure supplement 1B
	CHX/BFA n	CHX/BFA	PM n	PM
	0.556051	1.10615	0.993439	1.01644
	0.490157	0.978073	0.944108	1.03196
	0.154511	0.915602	1.12136	0.883912
	0.0920906	0.775481	1.12136	1.12136
	0.271275	0.773256	0.737563	0.98757
	0.360303	0.599838	1.12136	0.682261
	0.130624	0.859495	1.12136	1.00057
	0.325619	0.771665	1.12136	0.862353
	0.226188	0.770399	1.12136	0.955881
	0.335629	0.704146	1.12136	0.935895
	0.142568	0.573829	1.12136	1.03608
	0.272439	0.68132	0.905181	0.850615
	0.103658	0.558943	1.08014	0.844266
	0.339479	0.440998	1.07667	0.937794
	0.341413	0.643898	1.12136	1.12136
	0.350276	0.546247	0.550268	0.963478
	0.0720538	0.881363	0.688233	0.888019
	0.171861	0.896591	0.794594	0.687018
	0.152595	0.929872	0.614622	1.12136
	0.199992	0.90039	0.469351	1.12136
	0.122924	0.634385	0.910195	1.01644
	0.146811	0.588425	1.12136	1.12136
	0.262412	0.408658	1.12136	0.980914
	0.10056	0.385507	1.12136	1.12136
	0.269359	0.553861	0.568765	0.923849
	0.389973	0.803372	1.00961	1.12136
	0.267425	0.887711	0.736023	1.12136
	0.221962	0.762802	0.658939	1.12136
	0.329076	0.739651	1.12136	1.12136
	0.213475	0.876931	0.73948	1.09314
	0.265492	1.12136	0.662412	0.744716
	0.144108	1.04972	1.12136	1.12136
	0.144501	1.01644	0.981872	1.12136
	0.165701	1.10202	0.973778	0.972033
	0.0242632	1.11789	1.12136	0.974891
	0.0674339	1.12136	0.976858	1.12136
	0.168011	0.71999	0.779177	1.05225
	0.492091	0.90039	0.522531	0.927648
	0.326389	0.978381	0.578792	1.05098
	0.252402	1.07254	0.944108	1.12136
	0.235052	1.07762
	0.531001	0.871216
	0.437747	1.02816
	0.0905506	0.818275
	0.288626	0.824623
	0.749507	0.738385
	0.246995	0.713659
	0.195748	0.566232
	0.0516234	0.598247
	0.0732002	0.978706
	0.345656	0.772298
	0.381486	0.735852
	0.0454635	0.759944
	0.0959405	0.668641

## Sheet: Figure2-figure supplement 1D
	mock	DTT
	1.71153	1.53338
	2.10511	1.1913
	2.50785	1.3838
	1.43613	1.62531
	1.72681	1.2074
	2.18205	1.41972
	2.37872	1.52751
	2.13202	1.21687
	2.14495	1.29104
	2.34611	1.52462
	1.58345	1.5612
	2.57915	1.33908
	2.18372	1.18546
	1.75771	1.47535
	1.92187	1.4577
	1.66489	1.05617
	2.90066	1.26436
	1.51235	1.00416
	2.6239	1.751
	1.94821	1.42464
	1.2629	1.32697
	2.09277	1.69085
	2.16667	1.36727
	2.2949	1.61613
	3.08686	1.2189
	1.46256
