# Supplementary material for: Rapid translocation of NGR proteins driving polarization of PIN-activating D6 protein kinase during root gravitropism
Source: eLife. 2024 Mar 5;12:RP91523. doi: 10.7554/eLife.91523 (PMC10942638; doi:10.7554/eLife.91523)
Supplement: Figure 2—source data 1. [file elife-91523-fig2-data1.xlsx]

## Sheet: Figure 2B
CHX/BFA n	BFA bodies	PM n	PM	Amyloplast n	Amyloplast
0.0785516	1.22837	0.751043	1.6222	1.39095	0.337368
0.0433605	1.11005	0.683444	1.68855	1.72733	0.285928
0.670786	1.13285	1.47812	1.66817	0.504885	0.306486
0.578858	1.35926	1.18644	1.65569	2.03956	0.272821
0.670337	1.38807	0.252263	0.992354	0.537383	0.482262
0.259355	1.24255	0.720879	0.944235	0.825735	0.329019
0.462422	1.19722	1.64869	0.757238	0.939298	0.406134
0.357926	1.58432	1.62256	0.725727	1.08823	0.377766
0.424179	1.54994	1.05133	0.796469	0.651934	0.453894
0.389885	1.70704	0.832288	1.46546	0.838931	0.465026
0.450303	1.55362	0.819899	1.5511	0.650677	0.549951
0.451919	1.54509	0.713428	1.11804	1.01857	0.464397
0.0851948	1.58279	1.00923	1.30818	0.582898	0.517722
0.669798	1.53423	0.296611	1.29031	0.568265	0.396618
0.166799	1.43081	0.201092	0.895668	1.58935	0.38791
0.413855	1.33807	0.396169	0.80769	0.758764	0.375073
0.65337	1.49544	0.394284	0.82753	0.645919	0.476876
0.35631	1.40109	0.627156	0.777167	0.767113	0.300112
0.355143	1.91603	0.726535	0.897463	0.979337	0.500217
0.264113	1.75812	0.72456	0.563866	1.21023	0.329019
0.151537	1.62418	1.33484	0.530381	0.751492	0.363582
0.365736	1.34786	0.874481	0.585052	1.7899	0.385576
0.159078	1.31078	0.444647	0.530111	1.47614	0.351462
0.482531	1.12091	0.444737	0.507219	0.868018	0.355053
0.334405	1.44293	0.686496	0.448777	1.17854	0.414483
0.0907608	1.24498	0.844767	0.955906	1.05959	0.316181
0.306666	1.98695	0.388808	1.15251	0.460447	0.286826
0.388359	2.6695	0.636762	0.935078	0.781746	0.431271
0.195526	2.42918	0.936964	1.00187	1.00205	0.278118
0.531368	2.10204			0.941632	0.34051
0.455061	1.66556			0.458652	0.303883
0.337548	1.55541			1.54527	0.412867
0.306127	1.75291			0.605072	0.286287
0.405955	1.65237			0.34051	0.484147
0.105035	2.21139			0.344729	0.511708
0.613241	2.32019			0.349936	0.51072
0.702296	2.14504			0.552914	0.482262
0.388898	1.46887			0.714865	0.476696
0.306396	1.19641			0.91066	0.515927
0.192384	1.13725
0.329917	1.09658
0.351103	0.747452

## Sheet: Figure 2D
mock	PAO	DTT	LOV	FEN
2.02461	1.15142	1.51986	1.72868	0.982597
1.86818	1.486	1.00598	1.11957	0.962486
2.3271	1.14293	1.26407	1.58518	0.995926
1.99256	0.993669	0.68756	1.5473	0.963751
1.69718	1.18422	1.22138	0.794321	1.08768
2.00218	1.27812	0.924132	1.40031	1.08468
	1.25466	1.31543	1.10118	1.07197
1.9373	1.3075	1.13251		0.971396
3.30402	1.36609	1.01947		0.841203
2.03984	1.21424	1.07354		0.904228
1.88215	1.25762			0.895495
1.44431	1.16373
2.52899	1.14741
2.32109	1.31134
1.7117	1.2422
3.45032	1.64009
2.40423	1.36248
1.44079	1.98581
1.4429
2.65902
2.42331
1.67434
2.20243
1.39221
1.11202
1.77349
1.54223
