# Supplementary material for: Rapid translocation of NGR proteins driving polarization of PIN-activating D6 protein kinase during root gravitropism
Source: eLife. 2024 Mar 5;12:RP91523. doi: 10.7554/eLife.91523 (PMC10942638; doi:10.7554/eLife.91523)
Supplement: Figure 3—figure supplement 1—source data 1. [file elife-91523-fig3-figsupp1-data1.xlsx]

## Sheet: Figure3-figure supplement 1B
time, hours	NGR-GFP												-PALM												PBR2												PBR1&2
0	0	0	0	0	0	0	0	0	0	0			0	0	0	0	0	0	0						0	0	0	0	0	0	0	0					0	0	0	0	0	0
0.5	0.191459	3.26376	-3.94591	8.4276	9.60081	1.01633	1.54173	8.54674	0.793233	-1.96517			1.30042	5.29588	8.25123	4.89175	12.516	2.70543	5.8846						0.597384	-2.82722	3.37438	1.16189	0.233149	1.21139	5.1946	9.48674					3.57055	-3.95467	-3.9578	-4.04934	2.5133	5.09207
1	8.4472	11.7272	0.877499	18.9076	18.3022	4.97678	13.2249	13.7365	6.82418	-2.54555			5.9782	9.65656	16.826	7.02351	16.9457	7.34067	16.8693						8.19995	4.57735	7.84908	8.1367	4.45594	3.7406	9.59621	10.9216					4.69249	0.429366	-0.51891	-3.48537	8.9919	10.7609
1.5	15.3424	14.8022	3.7419	24.7217	24.0415	10.4249	14.4449	16.7123	11.9568	2.42998			10.8243	14.1061	24.0378	11.0357	20.9453	12.2539	20.7445						13.2896	11.816	11.7896	12.4334	7.56916	5.2434	12.9379	14.0836					8.43754	5.59716	2.219	-1.81258	14.8039	17.2391
2	21.3188	19.3213	9.89163	29.844	27.059	13.5603	21.228	22.0669	16.5068	6.94535			15.8668	17.9594	28.8236	14.1719	26.0098	16.3447	24.6019						20.0771	17.5369	16.9259	15.4836	11.231	6.27286	15.7696	16.3536					10.6646	9.67484	5.41944	0.271647	20.2972	23.3017
2.5	25.9354	22.66	14.3983	33.5401	32.1076	16.7469	23.5408	24.096	22.9041	14.0055			20.8142	21.3821	33.4265	17.8135	29.8783	21.3662	26.1481						24.7888	22.9252	20.4288	20.0267	15.8137	8.46172	19.4107	20.7082					13.1096	13.6258	8.87985	1.58312	25.3214	26.1428
3	29.9479	25.2524	19.3141	36.3365	35.3786	21.1707	26.3495	29.803	26.7088	18.8293			24.6652	25.1675	37.6962	21.7394	34.078	25.0389	29.3969						27.7036	27.6078	25.0278	23.2507	19.3339	10.902	22.675	23.6806					15.6248	17.2154	12.9489	4.73723	30.3133	29.2365
3.5	34.3345	28.9273	24.0211	40.5946	39.9609	25.8791	30.311	32.881	28.8332	24.568			30.0494	28.5525	41.2647	25.2284	38.0438	30.5426	31.4581						32.1695	32.5295	27.7208	26.5778	23.0748	12.6895	25.3411	27.0221					19.7535	20.12	16.3971	7.49727	34.9626	31.9282
4	36.8501	32.2219	29.421	42.4497	43.0925	30.0183	33.6495	34.7893	32.988	29.9544			34.6838	31.9635	44.6041	27.7525	42.3276	34.0549	34.3272						36.485	36.5096	31.1301	29.4607	25.9416	15.3634	28.9689	30.326					22.5661	23.1996	19.7014	10.7377	38.8571	35.6665
4.5	39.7859	35.2522	33.5345	45.4382	46.9565	33.093	36.1583	39.6506	36.1566	34.6689			37.8242	34.8561	48.5117	31.8676	46.493	36.8125	37.4472						40.8119	40.5849	35.26	32.467	28.6333	15.7857	31.5208	33.0573					26.3927	28.1889	23.0337	14.6659	42.3933	38.4481
5	43.6753	38.5834	37.1372	48.5254	50.2531	36.4763	38.5639	42.7082	38.842	38.3436			41.8495	37.8152	51.5824	34.9214	50.3084	39.8526	40.2191						44.6816	44.5581	38.0923	35.6826	31.7343	17.9279	35.2662	36.2398					29.9921	30.4232	27.3771	17.9346	46.4513	41.6216
5.5	46.2954	41.4836	41.0185	50.8861	54.2723	39.2802	41.1919	46.3436	42.1706	42.7501			45.2871	40.7904	54.1912	38.1746	53.2345	42.2257	43.2391						47.7175	48.2703	41.29	38.9641	35.221	20.6455	38.2852	39.5084					32.669	33.3692	31.5814	21.1365	49.3354	44.1407
6	48.5299	45.4252	44.7362	53.1583	57.212	42.4996	44.3377	49.7628	44.735	46.7661			47.4643	44.2755	56.9667	41.0183	57.6254	42.9629	46.3518						51.354	51.7785	44.2004	42.4456	38.8058	22.6787	41.2049	42.499					36.1139	36.4309	34.4124	24.5969	52.3655	47.4098
6.5	51.3642	47.9459	48.6007	55.0102	59.3223	44.9468	45.5765	53.0513	47.5654	50.6564			50.4773	47.8736	59.6754	43.9555	60.4256	45.5725	49.4375						54.5466	55.4096	47.5877	46.692	41.833	25.0699	44.4323	45.748					39.4599	38.7101	38.1772	27.9575	54.9242	50.4118
7	53.4002	51.0032	52.0747	57.7926	61.9654	47.6067	48.4366	56.8548	50.2524	54.5842			53.754	50.8883	61.9979	46.9491	63.5033	49.1495	52.0867						57.4752	58.1416	50.4742	49.5626	44.9822	26.8078	47.3486	48.626					42.9264	41.7634	41.7681	31.2723	57.6318	52.8918
7.5	55.6277	53.9568	55.0811	59.9407	64.2425	49.4745	50.9961	60.3667	52.6211	57.911			55.7254	54.0167	64.1399	49.2649	66.4784	50.5076	55.0036						60.4868	61.848	52.7548	53.045	48.0577	28.6536	50.0862	51.4979					45.5989	43.6878	45.4629	34.0475	59.954	55.6909
8	57.9758	56.3913	58.6161	62.3156	67.047	51.0301	53.0759	62.865	55.4356	61.5756			58.359	57.0749	66.5971	52.0086	69.4517	53.1271	57.974						63.493	64.9456	55.5368	56.1682	51.2183	30.3609	52.5472	54.4731					48.132	44.7636	48.5092	36.6592	61.9699	58.6968

## Sheet: Figure3-figure supplement 1D
NGR-GFP	-PALM	PBR2	PBR1&2
0.779485	0.865343	0.407915	0.812839
0.704532	0.816562	0.458002	0.786479
0.838358	0.915999	0.529044	0.899903
0.739075	0.832838	0.778876	0.885553
0.783539	0.843627	0.872606	0.998156
0.714324	0.811808	0.687035	1.13584
0.800048	0.897011	0.826311	1.17313
	0.952885	0.772041	1.37175
	0.980777	0.618716	0.84051
0.732684	0.973383	0.65392	0.929118
0.582977	0.764313	0.588387	0.895676
0.772816	0.72864	0.853651	0.888512
0.770672	0.782151	0.832869	0.818638
0.689699	0.758856	0.348457	0.974483
0.969368	0.569526	0.47554	0.933444
0.74384	0.683931	0.617668	1.10118
0.597755	0.900234	1.213	0.986513
	0.718379	0.800733	0.825999
	0.7619	0.53554	0.76474
0.738823	0.886816	0.742042	0.750195
0.749909	0.803808	0.671691	0.792297
0.704756	0.954402	0.783103	0.918298
0.796583	0.855625		1.32257
0.731225	0.826422	0.580048
0.815095	0.96405	0.534631
0.975166	1.00726	0.704552	0.889621
0.606286	0.816324	0.655013	0.679356
0.679423	1.01909	0.883002	0.774444
0.603298	0.869942	0.812925	0.840477
0.772272	0.678838	0.667455	0.808154
0.901451	0.863195	0.641661
	0.857889	0.772469
	0.960395	0.836415
0.519931	0.864456	0.750015	0.940777
0.577268	0.764958	0.923967	1.34027
0.598746	0.783825	0.838263	0.855333
0.688655		0.767647	1.02734
0.503653	0.809274	0.699672	0.930714
0.562155	0.743111	0.853578	2.01464
0.866604	0.953886		0.907376
0.766576	0.803408	0.398749	1.06788
0.625389	0.978951	0.638313	0.788445
0.464741	0.680681	0.837035	1.16966
0.60031	0.786065	0.847775	1.06873
0.452827	0.659634	0.86329
0.475945	0.712083	0.684171
0.767569	0.817749		0.762543
0.590927	0.805552	1.3715	1.25292
0.69185	0.864985	0.825805	0.899634
0.569936		0.603639	0.964106
	0.870883	1.08428	1.06078
	0.853579	0.792781	0.848829
	0.83422		0.74827
	0.856542	0.656747	1.11738
	0.854788	0.789621	0.761792
	0.767134	0.662409	0.631129
	0.947482	0.705078	0.807413
			0.726414
	0.933369	0.68507
	0.829473	0.847647
	0.910576	0.935707
	0.957235	0.881265
		0.501113
		0.853096
		0.897841
		0.997991
		0.448072
		0.982115
		0.719376
		1.05785
		1.00137
		0.86022
		0.625959
		1.20345
		1.01236
		0.805826
		0.694657
		0.805049
		1.00818
		0.744603
		0.958762
		0.935903
		0.923424
		1.00206
		0.496449
		0.412997
		0.900176
		0.681246
		1.11022
		1.01364
