# Supplementary material for: Rapid translocation of NGR proteins driving polarization of PIN-activating D6 protein kinase during root gravitropism
Source: eLife. 2024 Mar 5;12:RP91523. doi: 10.7554/eLife.91523 (PMC10942638; doi:10.7554/eLife.91523)
Supplement: Figure 3—figure supplement 2—source data 1. [file elife-91523-fig3-figsupp2-data1.xlsx]

## Sheet: Figure3-figure supplement 2E
NGR-GFP	Nmyr_ -PALM	Nmyr_ -PALM & PBR2	Nmyr_-PALM & PBR1&2
0.779485	0.83659	0.832716	0.787678
0.704532	0.457211	0.927285	0.825084
0.838358	0.881497	0.740874	0.838083
0.739075	0.78038	0.97693	0.800524
0.783539	0.783552	0.869086	0.847983
0.714324	0.808618	1.06601	0.973666
0.800048	0.606377	0.965791	0.927154
	0.339497	0.94702
	0.840798	0.90133
0.732684	0.759851	0.965157	0.744053
0.582977	0.813794	0.924447	0.992728
0.772816	0.899885	1.01696	1.04332
0.770672	0.53946	0.888071	0.976482
0.689699	1.14615		0.919436
0.969368	0.515759		1.03061
0.74384		1.18278	0.832973
0.597755	1.07051	1.14141	0.765115
	0.588388	1.05567	0.834567
	0.662881	0.894982	0.850905
0.738823	0.594744	1.07415
0.749909	0.723	1.05569
0.704756	0.447616	1.42525	0.779353
0.796583	0.464507	0.853301	0.785673
0.731225	0.59769	0.765959	0.929963
0.815095	0.603116	0.867113
0.975166	0.621454	0.903896
0.606286	0.610139	1.16339	0.822375
0.679423	0.755782	1.07885	0.839367
0.603298	0.575735	0.885463	0.977493
0.772272	0.56275	1.0584	0.934338
0.901451	1.25104	1.07675	0.687967
	1.01524	1.2491	0.704736
	0.566538	0.98354	0.809888
0.519931	0.582814	0.954636	1.06141
0.577268	0.548475	1.2635
0.598746	0.682988	0.987558
0.688655		0.821042
0.503653			0.949538
0.562155	0.785314		0.895979
0.866604	0.506883		0.785158
0.766576	0.583894	0.747207	0.86952
0.625389	0.414134	0.733203	0.930756
0.464741	0.819171	0.927622	0.933133
0.60031	0.576425	0.966094	1.03533
0.452827	0.520902	0.707297	1.05109
0.475945	0.391006	0.649078	1.03885
0.767569	0.431084	0.762064	0.878848
0.590927	0.647598	0.710104	0.774697
0.69185	0.620797	0.797031	0.918586
0.569936	0.620187	0.808427	0.991717
	0.576128	0.637401
	0.607013	0.740023
	0.652099	0.754538	0.909607
	0.55378	0.761075	0.993197
		0.81173	0.963644
		0.797428
	0.788143	0.774903
	0.589293	0.707532
	0.669015	0.681955
	0.459463	0.798067
	0.763606	0.655551
	0.935208	0.75156
	0.630281
	0.582448
	0.750318
	0.568326
	0.873444
	0.640697
	0.626448		0.656913
	0.7272		0.738483
			0.579597
			0.792544
			0.649336
			0.737145
			0.775972
			0.706296
			1.03737
			0.465523
			0.602634
			0.941999
			0.369217
			0.858771
			0.601702
			0.680261
			0.564317
			0.914573
			0.812416
			0.625187
			0.617443
			0.593772
			0.661948
			0.558615
			0.658297
			0.649408
			0.716182
			0.524049
			0.94994
			0.466158
			0.649845
			0.682317
			0.802927
			0.503939
			0.4558
			0.681013
			0.979974
			0.701701
			0.751935
			0.716916

## Sheet: Figure3-figure supplement 2F
NGR-GFP	-PALM_ROP-CT	-PALM & PBR2_ROP-CT	-PALM & PBR1&2_ROP-CT
0.779485	0.627681	0.646394	0.703392
0.704532	0.566457	0.546902	0.793519
0.838358	0.621993	0.687733	0.820345
0.739075	0.736725	0.457101	0.788292
0.783539	0.370705	0.421263	0.643462
0.714324	0.90721	0.539717	0.661437
0.800048	0.681248	0.609401	0.635597
	0.800851	0.592216	0.665967
	1.02515	0.390335	0.865412
0.732684	0.482489	0.659866	0.675877
0.582977	0.783494	0.426322	0.85417
0.772816	0.993836	0.710437	0.636421
0.770672	0.562001	0.621873	0.636474
0.689699	0.556455	0.526463	0.565873
0.969368	0.626951	0.594526	0.767935
0.74384	0.456305	0.550182
0.597755	0.167417	0.563484
	1.33333	0.436005	0.759641
	0.7968	0.528705	0.815257
0.738823	0.85425	0.481028	0.869895
0.749909	0.550966	0.465727	0.646674
0.704756		0.490627	0.846923
0.796583			0.754185
0.731225	0.773247		0.699404
0.815095	0.413677	0.651682	0.728652
0.975166	0.702611	0.801819	0.817305
0.606286	0.936883	0.890956	0.626829
0.679423	0.543069	0.624367
0.603298	0.811992	0.469188
0.772272	0.539427	0.592413	0.779116
0.901451	0.714338	0.615466	0.606239
	1.02176	0.687391	0.694874
	0.150172	0.697831	0.709753
0.519931	0.536174	0.846558	0.718614
0.577268	0.49818	0.687039	0.777984
0.598746	0.57288	0.682218	0.746772
0.688655	0.517936	0.521161	0.736481
0.503653	0.811906	0.608877	0.837829
0.562155	0.502421		0.750954
0.866604	0.640231		0.602276
0.766576	0.345427	0.620014	0.830796
0.625389	0.501883	0.601945	0.62107
0.464741	0.459616	0.885246	0.638325
0.60031	0.681622	0.647323	0.838268
0.452827	0.91373	0.845952	0.662583
0.475945	1.00738	0.590727
0.767569	0.617791	0.543752
0.590927	0.663684	0.727032	0.759602
0.69185	0.63487	0.723945	0.613802
0.569936		0.750232	0.749242
		0.888097	0.651252
		0.688995	0.690699
		0.678732	0.746632
		0.768651	0.618602
		0.497516	0.654172
		0.526532	0.862504
	0.366748	0.565757	0.569163
	0.446703	0.633228	0.765872
	0.576594	0.693305	0.667529
	0.722313	0.727601	0.69161
	0.320664	0.749467	0.825086
	0.27559	0.692912	0.73012
	0.396946	0.683934	0.669718
	0.353959	0.702409	0.705526
	0.295377	0.60736	0.811098
	0.354506	0.55273	0.615053
		0.834085
	0.399383	0.8186
	0.374845	0.641757	0.951863
	0.371785	0.73864	0.856807
	0.413238	0.581532	0.769178
	0.57489	0.48496	0.945221
	0.33206		0.802477
	0.317905	0.70982	0.943553
	0.524782	0.756229	0.816594
	0.515923	0.456205	0.758985
	0.45699	1.01477	0.77752
		0.541275	0.865736
	0.229736	0.829444	0.890761
	0.403179	0.624907	0.958246
	0.184768	0.639534	0.718773
	0.451434	0.362037
	0.382432	0.512962
	0.591647	0.575727	0.793061
	0.578166	0.67668	0.706268
	0.371133	0.578055	0.782787
	0.1978	0.493032	0.696809
	0.26688	0.42223	0.743418
	0.440243	0.5	0.786538
	0.407842		0.57663
	0.547371	0.651237	0.837404
	0.57691	0.907923	0.632109
	0.587967	0.887785	0.900436
		0.465694	0.619854
	0.450145	0.57452	1.02589
	0.385946	0.535547	0.828454
	0.381556	0.574457	0.8075
	0.537041	0.635137	0.826037
	0.35249	0.445506	0.611685
	0.406637	0.492777
	0.256516	0.597285
	0.392232	0.415983	0.55605
	0.577278	0.461977	0.815395
	0.372867		0.690635
	0.425706		0.814115
	0.423885	0.727762	0.747984
	0.813548	0.736319	0.628528
	0.672843	0.607304	0.733897
	0.398129	0.479108	0.749458
	0.284558	0.707763	0.759349
	0.446224	0.723936	0.682328
	0.333512	0.677968	0.66076
	0.394133	0.575595	0.657565
	0.491828	0.711034	0.816509
		0.511866	0.936329
		0.722849	0.807235
		0.476477
		0.80856
		0.834691	0.740552
		0.582424	0.82217
		0.580353	0.682427
		0.442873	0.56269
		0.531223	0.810753
		0.581203	0.70167
		0.661192	0.633417
		0.645512	1.06095
		0.783274	0.631175
		0.683688
		0.617926
		0.680869	0.73934
			0.680394
			0.718818
			0.830434
			0.697456
			1.01034
			0.760404
			0.978436
			0.872175
			0.670197
			0.821809
			0.945836
			0.803447
			0.652618
			0.377793
			0.4883
			0.758015
			0.605228
			0.678493
			0.593739
			0.366475
			0.542952
			0.689984
			0.536258
			0.8375
			0.553707
			0.575447
			0.374983
			0.307459
			0.366733
			0.449079
			0.538121
			0.390736
			0.426484
			0.450116
			0.503236
			0.827819
			0.30265
			0.397196
			0.565306
			0.405663
			0.40705
			0.416039

## Sheet: Figure 3-figure supplement 2G
time, hours	NGR-GFP												Nmyr_-PALM												Nmyr -PALM & PBR2												Nmyr -PALM & PBR1&2
0	0	0	0	0	0	0	0	0	0	0			0	0	0	0	0	0	0	0	0	0	0		0	0	0	0	0	0	0						0	0	0	0	0	0	0	0	0
0.5	0.191459	3.26376	-3.94591	8.4276	9.60081	1.01633	1.54173	8.54674	0.793233	-1.96517			1.29535	7.2129	3.07806	6.84256	4.47158	5.80214	4.33622	5.70633	1.55821	0.842265	0.0294013		4.80498	5.83955	0.341635	3.73404	4.83391	2.40447	5.16952						-7.67501	3.20215	-2.52307	-2.95071	-1.27865	-0.03228	-4.05264	1.32771	2.47483
1	8.4472	11.7272	0.877499	18.9076	18.3022	4.97678	13.2249	13.7365	6.82418	-2.54555			8.5714	9.90062	8.72692	13.8475	6.88458	9.51078	5.47414	8.8168	5.81593	5.53283	5.10468		8.06415	10.7002	6.52744	10.8705	8.92404	7.71111	9.3662						-4.24986	6.49137	-0.239156	-0.75243	-2.04048	2.99011	-1.40138	4.04688	4.36137
1.5	15.3424	14.8022	3.7419	24.7217	24.0415	10.4249	14.4449	16.7123	11.9568	2.42998			13.5633	12.2745	12.8756	16.4696	11.421	13.3216	7.8331	11.7544	9.58073	11.9693	8.93244		10.6632	15.5759	10.6991	14.1872	10.2583	10.075	12.1702						-4.03225	9.18631	0.996205	1.5146	-0.00931	5.04011	-1.57943	8.75137	5.38016
2	21.3188	19.3213	9.89163	29.844	27.059	13.5603	21.228	22.0669	16.5068	6.94535			16.7785	14.8294	16.9565	19.8829	15.679	17.1939	11.6705	14.3334	13.8639	17.0879	12.7785		11.8602	18.3239	14.7966	18.6843	13.273	12.3019	14.8689						-2.13458	11.3658	3.95984	1.56881	2.19896	8.05298	1.46627	9.56777	8.08382
2.5	25.9354	22.66	14.3983	33.5401	32.1076	16.7469	23.5408	24.096	22.9041	14.0055			18.9088	18.3403	22.3941	24.578	19.3947	21.3262	16.0069	17.0485	17.0627	20.9339	17.3155		13.6723	20.5072	19.1905	22.9204	16.0505	16.3676	17.4022						1.02422	13.9227	5.00759	4.9274	3.27907	10.115	2.85094	11.4611	10.3519
3	29.9479	25.2524	19.3141	36.3365	35.3786	21.1707	26.3495	29.803	26.7088	18.8293			21.3541	21.8238	25.2446	27.2885	22.2614	25.6258	19.539	18.3023	20.6365	25.3665	21.2914		15.6006	22.7859	22.1604	25.8352	18.8212	21.2191	21.1987						4.02676	16.4339	7.35906	7.15654	4.7698	12.6698	4.82489	13.6378	14.0781
3.5	34.3345	28.9273	24.0211	40.5946	39.9609	25.8791	30.311	32.881	28.8332	24.568			23.4501	25.2416	28.2481	29.4798	26.0248	28.6392	23.3704	20.6634	24.6566	29.1498	25.2132		16.8138	24.1339	25.82	29.0663	20.7387	24.6083	24.1577						4.77815	18.6891	10.3678	10.912	6.88757	14.6304	6.76412	14.7966	16.8269
4	36.8501	32.2219	29.421	42.4497	43.0925	30.0183	33.6495	34.7893	32.988	29.9544			25.9002	28.3078	31.962	33.8001	29.1765	31.85	27.3343	23.8972	28.4052	33.331	28.1082		18.724	27.0829	28.1871	31.9189	23.2606	28.3794	26.751						7.74745	22.0589	13.0743	13.2573	9.47334	16.8034	8.64428	18.4747	19.6576
4.5	39.7859	35.2522	33.5345	45.4382	46.9565	33.093	36.1583	39.6506	36.1566	34.6689			27.9057	30.786	36.1387	36.1795	31.6732	34.1788	30.7062	27.3432	31.4489	37.147	31.8096		20.5432	29.0088	30.6919	35.5299	24.8459	31.6908	29.6909						10.1211	24.0294	15.7714	17.1516	12.838	18.98	11.3383	21.2974	22.2845
5	43.6753	38.5834	37.1372	48.5254	50.2531	36.4763	38.5639	42.7082	38.842	38.3436			30.5597	33.7336	39.3445	38.4854	34.2291	36.4791	34.2167	30.3862	34.9862	39.943	34.5555		22.8347	31.2438	32.0197	36.4422	27.0563	34.6135	32.502						11.6634	27.1871	18.7371	20.9496	15.0505	21.4045	14.523	24.4628	24.5121
5.5	46.2954	41.4836	41.0185	50.8861	54.2723	39.2802	41.1919	46.3436	42.1706	42.7501			32.1219	35.7583	41.7096	40.7462	37.0804	39.6008	37.4613	33.1976	38.3257	43.4151	36.8308		24.9461	32.7149	34.4526	39.5396	28.8837	37.4894	34.9118						13.4014	30.1647	22.7709	24.3083	17.9736	23.3943	16.607	27.9456	27.6742
6	48.5299	45.4252	44.7362	53.1583	57.212	42.4996	44.3377	49.7628	44.735	46.7661			33.9979	38.2236	44.3411	43.6455	39.6843	42.8389	40.8265	36.7256	41.3713	45.6593	39.5449		27.1927	34.5181	36.728	41.7644	30.9718	40.0284	37.1912						15.982	32.6294	26.5317	27.881	20.9425	25.9321	18.9934	30.5972	30.4673
6.5	51.3642	47.9459	48.6007	55.0102	59.3223	44.9468	45.5765	53.0513	47.5654	50.6564			36.5954	40.5172	47.346	46.4346	41.6079	44.5955	43.9441	39.6593	44.3064	48.2595	42.1862		29.229	36.7789	39.3612	44.4897	32.4075	42.2932	39.8844						17.9195	36.0526	29.8351	30.755	24.3134	28.7174	21.797	33.3107	32.8538
7	53.4002	51.0032	52.0747	57.7926	61.9654	47.6067	48.4366	56.8548	50.2524	54.5842			38.6299	42.2705	49.9536	48.5447	44.141	47.3403	47.4338	42.4615	47.4332	50.879	44.6763		31.6027	38.3244	41.8383	46.457	34.0624	44.2989	41.7124						19.8737	39.4382	33.2063	33.8356	27.1697	31.2978	24.067	36.3248	35.1443
7.5	55.6277	53.9568	55.0811	59.9407	64.2425	49.4745	50.9961	60.3667	52.6211	57.911			40.9855	44.7686	52.4353	51.1304	45.9812	50.5464	50.5267	45.1511	50.2652	52.8006	46.7124		33.7435	40.1364	43.0715	48.2058	35.9457	46.3015	43.7499						22.3518	42.6081	36.5328	37.1186	30.3041	33.9846	26.7925	38.9108	37.4894
8	57.9758	56.3913	58.6161	62.3156	67.047	51.0301	53.0759	62.865	55.4356	61.5756			42.4209	46.7267	54.8869	53.4043	47.8278	52.8647	53.5004	47.431	52.959	54.8337	48.6463		35.7953	42.0531	44.5438	50.3015	37.2566	48.2851	45.2644						23.9825	45.5468	40.1604	40.6329	33.3792	36.9153	29.378	41.774	39.6126

## Sheet: Figure3-figure supplement 2H
time, hours	NGR-GFP												-PALM _ ROP-CT												-PALM & PBR2 _ ROP-CT												-PALM & PBR1&2 _ ROP-CT
0	0	0	0	0	0	0	0	0	0	0			0	0	0	0	0	0	0						0	0	0	0	0								0	0	0	0	0	0	0	0	0
0.5	0.191459	3.26376	-3.94591	8.4276	9.60081	1.01633	1.54173	8.54674	0.793233	-1.96517			16.0716	15.1192	7.50572	3.56194	1.3361	3.78878	2.68436						9.01098	8.35374	3.20328	5.77397	6.0329								5.17166	3.72586	0.007097	2.60958	2.60262	2.48771	7.70335	1.38002	0.22029
1	8.4472	11.7272	0.877499	18.9076	18.3022	4.97678	13.2249	13.7365	6.82418	-2.54555			24.8194	19.351	14.68	7.97442	7.42755	9.17565	7.4692						18.1088	11.1394	11.2544	9.06268	11.9981								5.79973	7.75113	3.12523	8.26617	4.66426	4.63978	10.2325	4.6066	3.10704
1.5	15.3424	14.8022	3.7419	24.7217	24.0415	10.4249	14.4449	16.7123	11.9568	2.42998			33.0388	25.5122	17.4381	11.8785	12.1077	12.7933	8.4409						21.8574	15.3746	15.0561	12.9808	16.2877								8.13758	11.8453	8.59349	10.3979	5.91459	5.23362	11.6481	10.6195	8.72648
2	21.3188	19.3213	9.89163	29.844	27.059	13.5603	21.228	22.0669	16.5068	6.94535			36.3591	28.1646	19.9567	15.5819	17.057	17.3012	13.0756						26.9749	18.0114	18.6716	15.9909	18.9038								8.09921	14.729	10.346	12.7587	7.64555	7.81223	12.2174	14.1563	12.4757
2.5	25.9354	22.66	14.3983	33.5401	32.1076	16.7469	23.5408	24.096	22.9041	14.0055			40.5812	32.415	21.0754	18.4405	21.62	20.0659	15.2884						29.2921	20.7467	23.0325	18.4557	23.0906								8.40564	16.1448	12.9032	15.1927	8.79776	9.43558	14.9376	17.8577	16.1936
3	29.9479	25.2524	19.3141	36.3365	35.3786	21.1707	26.3495	29.803	26.7088	18.8293			43.8452	35.744	23.2711	20.1211	25.503	24.0621	18.5481						31.9143	21.6763	25.857	20.6537	26.1912								10.3689	19.4383	15.7798	18.1066	12.4171	13.3326	16.8459	20.3403	18.691
3.5	34.3345	28.9273	24.0211	40.5946	39.9609	25.8791	30.311	32.881	28.8332	24.568			47.097	39.0176	25.5044	23.8634	29.7038	27.7694	22.1658						35.2127	24.3429	29.1245	23.5126	28.9409								11.5504	23.0667	19.7477	20.8047	13.0385	14.0481	19.5935	22.782	20.9187
4	36.8501	32.2219	29.421	42.4497	43.0925	30.0183	33.6495	34.7893	32.988	29.9544			49.7405	42.0622	27.5165	27.7827	33.5059	31.8893	25.5169						37.4048	26.8426	32.5844	25.5022	31.8344								13.6487	25.6169	22.5457	23.864	16.2445	17.5309	21.9496	26.0285	24.2422
4.5	39.7859	35.2522	33.5345	45.4382	46.9565	33.093	36.1583	39.6506	36.1566	34.6689			52.7897	45.0994	30.3063	30.74	36.5858	34.8963	28.8328						39.7171	29.1903	35.4347	28.0218	34.7282								15.3923	27.7312	24.9163	26.9898	19.9855	21.6089	24.6149	28.2809	26.7326
5	43.6753	38.5834	37.1372	48.5254	50.2531	36.4763	38.5639	42.7082	38.842	38.3436			54.9428	47.3676	33.8882	33.6246	39.9385	37.3707	31.6943						42.9323	32.4042	38.2294	30.0797	37.6719								17.6812	30.2948	28.1284	29.97	22.6187	24.6795	27.7733	31.1743	29.7039
5.5	46.2954	41.4836	41.0185	50.8861	54.2723	39.2802	41.1919	46.3436	42.1706	42.7501			57.9379	49.3809	36.8765	36.1468	42.6667	40.4627	34.521						46.2423	34.5446	40.8075	32.7168	40.4387								19.8057	32.8193	29.8459	33.1782	24.8397	27.0201	29.654	33.6677	32.3244
6	48.5299	45.4252	44.7362	53.1583	57.212	42.4996	44.3377	49.7628	44.735	46.7661			60.3685	51.4034	40.0856	38.9396	46.1401	43.8057	37.4246						48.2836	37.7599	43.6114	35.8261	43.015								21.8671	35.6229	32.7935	36.5318	28.1087	30.3596	31.3091	35.9549	34.7922
6.5	51.3642	47.9459	48.6007	55.0102	59.3223	44.9468	45.5765	53.0513	47.5654	50.6564			62.3766	53.919	43.0576	41.2444	48.5026	46.3988	40.3071						51.1123	40.6493	46.0297	38.025	45.2535								24.6647	38.0261	35.3775	39.5282	31.0649	33.7591	33.8853	39.0488	38.0271
7	53.4002	51.0032	52.0747	57.7926	61.9654	47.6067	48.4366	56.8548	50.2524	54.5842			63.4252	55.7025	45.8964	44.1381	51.3614	48.9007	42.6786						54.438	42.6941	48.8182	40.8603	47.9419								27.1173	41.164	38.4208	43.0226	34.264	37.2249	36.2615	41.2485	40.2454
7.5	55.6277	53.9568	55.0811	59.9407	64.2425	49.4745	50.9961	60.3667	52.6211	57.911			65.9237	57.7841	48.9999	45.8832	53.883	51.5528	45.7153						56.7062	45.7374	51.3222	43.2508	50.4248								29.7954	43.7278	40.5867	46.161	36.9054	39.9211	38.5305	43.8319	42.987
8	57.9758	56.3913	58.6161	62.3156	67.047	51.0301	53.0759	62.865	55.4356	61.5756			68.3251	60.7354	51.6461	48.2887	56.6331	54.1328	48.5157						58.7038	48.9954	53.2656	45.3847	52.7219								32.2544	46.3399	42.8968	48.5703	40.1047	43.2351	41.2192	46.6506	45.7639
