# Supplementary material for: Rapid translocation of NGR proteins driving polarization of PIN-activating D6 protein kinase during root gravitropism
Source: eLife. 2024 Mar 5;12:RP91523. doi: 10.7554/eLife.91523 (PMC10942638; doi:10.7554/eLife.91523)
Supplement: Figure 3—source data 1. [file elife-91523-fig3-data1.xlsx]

## Sheet: Figure 3B
time, hours	Col-0												NGR-GFP												-PALM & PBR2												-PALM & PBR1&2												ngr1/2/3
0	0	0	0	0	0	0	0	0	0	0	0		0	0	0	0	0	0	0	0	0	0			0	0	0	0	0	0	0	0	0				-1.07683	0.503887	-4.68513	4.75604	-2.06802	-7.37545	-1.25277	-0.17339					0
0.5	1.05932	-0.7391	5.69379	4.60443	7.33136	7.80281	3.06461	7.4661	0.972233	-2.43876	2.13534		0.191459	3.26376	-3.94591	8.4276	9.60081	1.01633	1.54173	8.54674	0.793233	-1.96517			3.73386	2.1208	7.58708	5.67792	1.55897	5.28245	3.35232	5.76002	-0.54364				-5.11537	1.39392	-5.40697	6.05339	-4.45229	-8.31046	-0.55009	-0.28252					3.63522
1	11.3979	8.62573	10.4098	11.9207	14.5595	14.9083	9.96111	12.874	7.33234	2.87904	7.30528		8.4472	11.7272	0.877499	18.9076	18.3022	4.97678	13.2249	13.7365	6.82418	-2.54555			9.2649	8.27685	12.7789	14.539	9.6796	9.04373	9.43363	11.0248	3.54202				-3.78716	0.61991	-5.19134	3.59591	-4.04066	-7.96456	0.22311	-0.53016					1.88905
1.5	18.4672	12.8263	14.5983	19.402	19.8371	21.8194	16.1656	15.9574	12.2169	6.57559	12.6564		15.3424	14.8022	3.7419	24.7217	24.0415	10.4249	14.4449	16.7123	11.9568	2.42998			11.5196	11.9681	16.669	18.8202	11.534	10.0526	14.1886	14.9835	4.81365				-3.50222	0.851019	-5.10325	3.23178	-5.30908	-7.8094	-0.0368	-0.06719					2.57233
2	24.2426	18.3309	21.2289	23.4579	23.8824	26.5162	21.4465	20.1832	17.2491	11.2388	14.2593		21.3188	19.3213	9.89163	29.844	27.059	13.5603	21.228	22.0669	16.5068	6.94535			14.5676	15.3202	19.8928	22.2189	12.0411	12.6315	17.3854	18.0161	6.68244				-3.5118	0.978848	-4.85275	3.5384	-4.62786	-6.32286	0.79125	0.545971					1.57921
2.5	29.163	22.5419	25.5891	27.6071	28.8432	30.2873	26.3941	23.2328	22.6717	16.0835	21.0831		25.9354	22.66	14.3983	33.5401	32.1076	16.7469	23.5408	24.096	22.9041	14.0055			16.7341	15.5062	22.9908	25.6742	15.9294	15.4772	21.7205	20.4785	6.90091				-3.97426	2.75014	-4.1522	4.80992	-3.93519	-6.34582	1.70149	0.550227					1.09071
3	33.6949	26.55	27.9347	32.844	33.9774	33.9672	30.7582	26.3077	25.1898	19.8279	25.2375		29.9479	25.2524	19.3141	36.3365	35.3786	21.1707	26.3495	29.803	26.7088	18.8293			19.5563	18.9819	24.6601	28.2003	18.2333	17.9046	24.6399	23.1596	6.95207				-2.86483	3.66632	-2.87965	5.69939	-3.1962	-5.78822	1.96059	2.05736					0.134092
3.5	38.7691	31.6476	30.9711	37.9017	37.9517	37.1241	34.8773	28.0448	29.8768	23.7734	28.7155		34.3345	28.9273	24.0211	40.5946	39.9609	25.8791	30.311	32.881	28.8332	24.568			22.428	20.9173	27.9858	31.3291	18.8501	21.8074	28.4696	25.1468	8.09033				-3.61694	3.49209	-2.18339	5.86365	-2.17941	-5.00802	2.54104	3.27998					-0.4529
4	43.0491	34.9539	33.6108	41.7193	41.5263	42.0063	38.9689	31.4534	32.2225	27.7443	34.2665		36.8501	32.2219	29.421	42.4497	43.0925	30.0183	33.6495	34.7893	32.988	29.9544			24.9139	22.9879	31.3912	34.2449	21.0397	25.4644	31.4975	27.9732	8.41261				-3.40936	4.16469	-0.36073	5.70658	-2.2112	-3.84977	3.534	4.6257					1.01505
4.5	47.5644	38.5389	36.94	46.325	45.7849	45.5802	42.1641	33.0127	36.1046	32.066	38.858		39.7859	35.2522	33.5345	45.4382	46.9565	33.093	36.1583	39.6506	36.1566	34.6689			27.3454	26.3962	34.2519	36.75	22.8119	28.6726	34.5656	30.2223	9.77551				-3.12676	4.55922	1.52734	7.60643	-2.04285	-3.65636	3.75666	4.8552					0.257587
5	52.1837	41.0171	39.4119	50.1004	48.8331	49.4274	46.3366	35.5981	39.5916	35.0421	42.9804		43.6753	38.5834	37.1372	48.5254	50.2531	36.4763	38.5639	42.7082	38.842	38.3436			30.326	28.6427	36.93	39.1222	24.9616	32.1973	37.9581	32.7201	12.1051				-2.59748	5.10889	3.33529	8.88668	-1.65515	-2.28398	4.58824	6.00036					0.015776
5.5	55.938	43.9866	42.1243	54.1282	52.3735	52.2191	49.978	38.312	43.379	39.1695	47.0074		46.2954	41.4836	41.0185	50.8861	54.2723	39.2802	41.1919	46.3436	42.1706	42.7501			32.4618	31.7765	39.8265	41.116	26.8676	35.5482	40.6603	35.1194	12.8746				-1.87139	5.06593	5.80534	10.3134	-1.25357	-1.44687	4.83718	6.60553					0.912023
6	60.3362	46.8105	44.9911	57.7558	55.4607	55.5137	52.9001	40.5479	47.1397	42.1494	50.6164		48.5299	45.4252	44.7362	53.1583	57.212	42.4996	44.3377	49.7628	44.735	46.7661			35.2626	34.5928	42.892	43.2912	28.8502	38.923	43.5077	37.8488	14.2885				-2.03125	5.50519	7.83986	11.3331	-1.02067	-0.44521	5.6138	7.31506					1.07763
6.5	64.1478	49.4728	47.854	60.9001	58.7654	58.218	55.1529	42.8407	51.0217	45.6106	52.8348		51.3642	47.9459	48.6007	55.0102	59.3223	44.9468	45.5765	53.0513	47.5654	50.6564			37.8502	37.4784	46.1905	45.7424	31.0474	42.3389	46.4846	40.4919	16.0804				-1.33754	6.03029	10.5015	11.843	-1.37039	-0.22791	6.19349	7.539					2.21032
7	67.4502	51.5903	51.2478	63.5787	61.0874	60.4623	58.2755	45.4956	54.1646	48.643	57.2524		53.4002	51.0032	52.0747	57.7926	61.9654	47.6067	48.4366	56.8548	50.2524	54.5842			40.2581	40.3984	48.8852	48.3345	33.6028	45.5861	49.235	43.31	18.0944				-0.53833	6.05154	12.9507	13.3155	-1.8757	0.604816	6.79643	8.19663					3.3127
7.5	70.6972	53.367	53.8556	65.5578	63.3344	62.9672	60.1874	47.9556	57.2494	50.8483	61.1294		55.6277	53.9568	55.0811	59.9407	64.2425	49.4745	50.9961	60.3667	52.6211	57.911			42.5148	42.9594	52.2207	50.4088	36.5972	49.0406	52.1658	45.8107	20.5956				0.088067	6.00153	15.8027	14.6788	-1.79876	1.23913	7.63655	9.17813					4.35028
8	73.8649	55.295	56.723	67.962	65.4857	64.8027	61.5484	49.8312	59.8321	53.4649	64.7757		57.9758	56.3913	58.6161	62.3156	67.047	51.0301	53.0759	62.865	55.4356	61.5756			45.0241	45.7032	55.0554	52.5344	40.1397	52.0061	54.9239	48.5972	23.3265				1.1014	5.9487	18.0406	16.5036	-2.50566	2.54948	8.6414	10.0592					4.4621
[truncated: 1 more columns]

## Sheet: Figure 3D
NGR-GFP	-PALM & PBR2	-PALM & PBR1&2
0.779485	1.04008	1.13742
0.704532	1.11775	1.3876
0.838358	1.16079	1.18946
0.739075	1.09386	1.08115
0.783539	1.60527	0.96793
0.714324	1.0001	1.09951
0.800048	0.924576	1.1804
	1.23069	1.10166
	1.1937	1.31583
0.732684	1.00056	1.21576
0.582977	1.1798	1.03705
0.772816	0.925262	1.09162
0.770672	0.901869	1.20097
0.689699	0.975945	1.04394
0.969368	0.80444	0.903159
0.74384	1.09223	1.03641
0.597755	0.830551	1.08817
	0.918264	0.965204
	1.21797	0.952565
0.738823	1.0459	0.981745
0.749909	0.944406	0.991698
0.704756	1.17984	1.06001
0.796583	1.03164	1.04318
0.731225	1.09002	0.99351
0.815095	0.782686	1.30529
0.975166	1.17243	1.22617
0.606286	1.02974	1.08163
0.679423	1.25418	1.41543
0.603298	1.76454	1.12937
0.772272	1.0047	1.31655
0.901451	1.19475	1.47229
	1.34863	1.19967
	1.19732	1.31847
0.519931	0.868342	1.45534
0.577268	1.16844	1.16071
0.598746		1.30286
0.688655		1.04866
0.503653		1.21041
0.562155		0.99803
0.866604		1.0647
0.766576		1.13056
0.625389		1.17752
0.464741		1.0889
0.60031		1.42233
0.452827		1.47944
0.475945		1.33263
0.767569		1.01239
0.590927		1.26563
0.69185		1.07019
0.569936		1.31465
		0.983874
		1.20343
		1.07266
		0.945271

## Sheet: Figure 3F
NGR-GFP	-PALM & PBR1&2	Nmyr_-PALM & PBR1&2	-PALM & PBR1&2_ROP-CT
0.779485	1.13742	0.787678	0.703392
0.704532	1.3876	0.825084	0.793519
0.838358	1.18946	0.838083	0.820345
0.739075	1.08115	0.800524	0.788292
0.783539	0.96793	0.847983	0.643462
0.714324	1.09951	0.973666	0.661437
0.800048	1.1804	0.927154	0.635597
	1.10166		0.665967
	1.31583		0.865412
0.732684	1.21576	0.744053	0.675877
0.582977	1.03705	0.992728	0.85417
0.772816	1.09162	1.04332	0.636421
0.770672	1.20097	0.976482	0.636474
0.689699	1.04394	0.919436	0.565873
0.969368	0.903159	1.03061	0.767935
0.74384	1.03641	0.832973
0.597755	1.08817	0.765115
	0.965204	0.834567	0.759641
	0.952565	0.850905	0.815257
0.738823	0.981745		0.869895
0.749909	0.991698		0.646674
0.704756	1.06001	0.779353	0.846923
0.796583	1.04318	0.785673	0.754185
0.731225	0.99351	0.929963	0.699404
0.815095	1.30529		0.728652
0.975166	1.22617		0.817305
0.606286	1.08163	0.822375	0.626829
0.679423	1.41543	0.839367
0.603298	1.12937	0.977493
0.772272	1.31655	0.934338	0.779116
0.901451	1.47229	0.687967	0.606239
	1.19967	0.704736	0.694874
	1.31847	0.809888	0.709753
0.519931	1.45534	1.06141	0.718614
0.577268	1.16071		0.777984
0.598746	1.30286		0.746772
0.688655	1.04866		0.736481
0.503653	1.21041	0.949538	0.837829
0.562155	0.99803	0.895979	0.750954
0.866604	1.0647	0.785158	0.602276
0.766576	1.13056	0.86952	0.830796
0.625389	1.17752	0.930756	0.62107
0.464741	1.0889	0.933133	0.638325
0.60031	1.42233	1.03533	0.838268
0.452827	1.47944	1.05109	0.662583
0.475945	1.33263	1.03885
0.767569	1.01239	0.878848
0.590927	1.26563	0.774697	0.759602
0.69185	1.07019	0.918586	0.613802
0.569936	1.31465	0.991717	0.749242
	0.983874		0.651252
	1.20343		0.690699
	1.07266	0.909607	0.746632
	0.945271	0.993197	0.618602
		0.963644	0.654172
			0.862504
			0.569163
			0.765872
			0.667529
			0.69161
			0.825086
			0.73012
			0.669718
			0.705526
			0.811098
			0.615053
		0.656913	0.951863
		0.738483	0.856807
		0.579597	0.769178
		0.792544	0.945221
		0.649336	0.802477
		0.737145	0.943553
		0.775972	0.816594
		0.706296	0.758985
		1.03737	0.77752
		0.465523	0.865736
		0.602634	0.890761
		0.941999	0.958246
		0.369217	0.718773
		0.858771
			0.793061
		0.601702	0.706268
		0.680261	0.782787
		0.564317	0.696809
		0.914573	0.743418
		0.812416	0.786538
		0.625187	0.57663
		0.617443	0.837404
		0.593772	0.632109
			0.900436
			0.619854
		0.661948	1.02589
		0.558615	0.828454
		0.658297	0.8075
		0.649408	0.826037
		0.716182	0.611685
		0.524049
		0.94994
		0.466158	0.55605
		0.649845	0.815395
		0.682317	0.690635
		0.802927	0.814115
		0.503939	0.747984
		0.4558	0.628528
		0.681013	0.733897
		0.979974	0.749458
		0.701701	0.759349
		0.751935	0.682328
		0.716916	0.66076
			0.657565
			0.816509
			0.936329
			0.807235
			0.740552
			0.82217
			0.682427
			0.56269
			0.810753
			0.70167
			0.633417
			1.06095
			0.631175
			0.73934
			0.680394
			0.718818
			0.830434
			0.697456
			1.01034
			0.760404
			0.978436
			0.872175
			0.670197
			0.821809
			0.945836
			0.803447
			0.652618
			0.377793
			0.4883
			0.758015
			0.605228
			0.678493
			0.593739
			0.366475
			0.542952
			0.689984
			0.536258
			0.8375
			0.553707
			0.575447
			0.374983
			0.307459
			0.366733
			0.449079
			0.538121
			0.390736
			0.426484
			0.450116
			0.503236
			0.827819
			0.30265
			0.397196
			0.565306
			0.405663
			0.40705
			0.416039

## Sheet: Figure 3G
time, hours	NGR-GFP												-PALM & PBR1&2												Nmyr -PALM & PBR1&2
0	0	0	0	0	0	0	0	0	0	0			-1.07683	0.503887	-4.68513	4.75604	-2.06802	-7.37545	-1.25277	-0.17339					0	0	0	0	0	0	0	0	0
0.5	0.191459	3.26376	-3.94591	8.4276	9.60081	1.01633	1.54173	8.54674	0.793233	-1.96517			-5.11537	1.39392	-5.40697	6.05339	-4.45229	-8.31046	-0.55009	-0.28252					-7.67501	3.20215	-2.52307	-2.95071	-1.27865	-0.03228	-4.05264	1.32771	2.47483
1	8.4472	11.7272	0.877499	18.9076	18.3022	4.97678	13.2249	13.7365	6.82418	-2.54555			-3.78716	0.61991	-5.19134	3.59591	-4.04066	-7.96456	0.22311	-0.53016					-4.24986	6.49137	-0.239156	-0.75243	-2.04048	2.99011	-1.40138	4.04688	4.36137
1.5	15.3424	14.8022	3.7419	24.7217	24.0415	10.4249	14.4449	16.7123	11.9568	2.42998			-3.50222	0.851019	-5.10325	3.23178	-5.30908	-7.8094	-0.0368	-0.06719					-4.03225	9.18631	0.996205	1.5146	-0.00931	5.04011	-1.57943	8.75137	5.38016
2	21.3188	19.3213	9.89163	29.844	27.059	13.5603	21.228	22.0669	16.5068	6.94535			-3.5118	0.978848	-4.85275	3.5384	-4.62786	-6.32286	0.79125	0.545971					-2.13458	11.3658	3.95984	1.56881	2.19896	8.05298	1.46627	9.56777	8.08382
2.5	25.9354	22.66	14.3983	33.5401	32.1076	16.7469	23.5408	24.096	22.9041	14.0055			-3.97426	2.75014	-4.1522	4.80992	-3.93519	-6.34582	1.70149	0.550227					1.02422	13.9227	5.00759	4.9274	3.27907	10.115	2.85094	11.4611	10.3519
3	29.9479	25.2524	19.3141	36.3365	35.3786	21.1707	26.3495	29.803	26.7088	18.8293			-2.86483	3.66632	-2.87965	5.69939	-3.1962	-5.78822	1.96059	2.05736					4.02676	16.4339	7.35906	7.15654	4.7698	12.6698	4.82489	13.6378	14.0781
3.5	34.3345	28.9273	24.0211	40.5946	39.9609	25.8791	30.311	32.881	28.8332	24.568			-3.61694	3.49209	-2.18339	5.86365	-2.17941	-5.00802	2.54104	3.27998					4.77815	18.6891	10.3678	10.912	6.88757	14.6304	6.76412	14.7966	16.8269
4	36.8501	32.2219	29.421	42.4497	43.0925	30.0183	33.6495	34.7893	32.988	29.9544			-3.40936	4.16469	-0.36073	5.70658	-2.2112	-3.84977	3.534	4.6257					7.74745	22.0589	13.0743	13.2573	9.47334	16.8034	8.64428	18.4747	19.6576
4.5	39.7859	35.2522	33.5345	45.4382	46.9565	33.093	36.1583	39.6506	36.1566	34.6689			-3.12676	4.55922	1.52734	7.60643	-2.04285	-3.65636	3.75666	4.8552					10.1211	24.0294	15.7714	17.1516	12.838	18.98	11.3383	21.2974	22.2845
5	43.6753	38.5834	37.1372	48.5254	50.2531	36.4763	38.5639	42.7082	38.842	38.3436			-2.59748	5.10889	3.33529	8.88668	-1.65515	-2.28398	4.58824	6.00036					11.6634	27.1871	18.7371	20.9496	15.0505	21.4045	14.523	24.4628	24.5121
5.5	46.2954	41.4836	41.0185	50.8861	54.2723	39.2802	41.1919	46.3436	42.1706	42.7501			-1.87139	5.06593	5.80534	10.3134	-1.25357	-1.44687	4.83718	6.60553					13.4014	30.1647	22.7709	24.3083	17.9736	23.3943	16.607	27.9456	27.6742
6	48.5299	45.4252	44.7362	53.1583	57.212	42.4996	44.3377	49.7628	44.735	46.7661			-2.03125	5.50519	7.83986	11.3331	-1.02067	-0.44521	5.6138	7.31506					15.982	32.6294	26.5317	27.881	20.9425	25.9321	18.9934	30.5972	30.4673
6.5	51.3642	47.9459	48.6007	55.0102	59.3223	44.9468	45.5765	53.0513	47.5654	50.6564			-1.33754	6.03029	10.5015	11.843	-1.37039	-0.22791	6.19349	7.539					17.9195	36.0526	29.8351	30.755	24.3134	28.7174	21.797	33.3107	32.8538
7	53.4002	51.0032	52.0747	57.7926	61.9654	47.6067	48.4366	56.8548	50.2524	54.5842			-0.53833	6.05154	12.9507	13.3155	-1.8757	0.604816	6.79643	8.19663					19.8737	39.4382	33.2063	33.8356	27.1697	31.2978	24.067	36.3248	35.1443
7.5	55.6277	53.9568	55.0811	59.9407	64.2425	49.4745	50.9961	60.3667	52.6211	57.911			0.088067	6.00153	15.8027	14.6788	-1.79876	1.23913	7.63655	9.17813					22.3518	42.6081	36.5328	37.1186	30.3041	33.9846	26.7925	38.9108	37.4894
8	57.9758	56.3913	58.6161	62.3156	67.047	51.0301	53.0759	62.865	55.4356	61.5756			1.1014	5.9487	18.0406	16.5036	-2.50566	2.54948	8.6414	10.0592					23.9825	45.5468	40.1604	40.6329	33.3792	36.9153	29.378	41.774	39.6126

## Sheet: Figure 3H
time, hours	NGR-GFP												-PALM & PBR1&2												-PALM & PBR1&2 _ ROP-CT
0	0	0	0	0	0	0	0	0	0	0			-1.07683	0.503887	-4.68513	4.75604	-2.06802	-7.37545	-1.25277	-0.17339					0	0	0	0	0	0	0	0	0
0.5	0.191459	3.26376	-3.94591	8.4276	9.60081	1.01633	1.54173	8.54674	0.793233	-1.96517			-5.11537	1.39392	-5.40697	6.05339	-4.45229	-8.31046	-0.55009	-0.28252					5.17166	3.72586	0.007097	2.60958	2.60262	2.48771	7.70335	1.38002	0.22029
1	8.4472	11.7272	0.877499	18.9076	18.3022	4.97678	13.2249	13.7365	6.82418	-2.54555			-3.78716	0.61991	-5.19134	3.59591	-4.04066	-7.96456	0.22311	-0.53016					5.79973	7.75113	3.12523	8.26617	4.66426	4.63978	10.2325	4.6066	3.10704
1.5	15.3424	14.8022	3.7419	24.7217	24.0415	10.4249	14.4449	16.7123	11.9568	2.42998			-3.50222	0.851019	-5.10325	3.23178	-5.30908	-7.8094	-0.0368	-0.06719					8.13758	11.8453	8.59349	10.3979	5.91459	5.23362	11.6481	10.6195	8.72648
2	21.3188	19.3213	9.89163	29.844	27.059	13.5603	21.228	22.0669	16.5068	6.94535			-3.5118	0.978848	-4.85275	3.5384	-4.62786	-6.32286	0.79125	0.545971					8.09921	14.729	10.346	12.7587	7.64555	7.81223	12.2174	14.1563	12.4757
2.5	25.9354	22.66	14.3983	33.5401	32.1076	16.7469	23.5408	24.096	22.9041	14.0055			-3.97426	2.75014	-4.1522	4.80992	-3.93519	-6.34582	1.70149	0.550227					8.40564	16.1448	12.9032	15.1927	8.79776	9.43558	14.9376	17.8577	16.1936
3	29.9479	25.2524	19.3141	36.3365	35.3786	21.1707	26.3495	29.803	26.7088	18.8293			-2.86483	3.66632	-2.87965	5.69939	-3.1962	-5.78822	1.96059	2.05736					10.3689	19.4383	15.7798	18.1066	12.4171	13.3326	16.8459	20.3403	18.691
3.5	34.3345	28.9273	24.0211	40.5946	39.9609	25.8791	30.311	32.881	28.8332	24.568			-3.61694	3.49209	-2.18339	5.86365	-2.17941	-5.00802	2.54104	3.27998					11.5504	23.0667	19.7477	20.8047	13.0385	14.0481	19.5935	22.782	20.9187
4	36.8501	32.2219	29.421	42.4497	43.0925	30.0183	33.6495	34.7893	32.988	29.9544			-3.40936	4.16469	-0.36073	5.70658	-2.2112	-3.84977	3.534	4.6257					13.6487	25.6169	22.5457	23.864	16.2445	17.5309	21.9496	26.0285	24.2422
4.5	39.7859	35.2522	33.5345	45.4382	46.9565	33.093	36.1583	39.6506	36.1566	34.6689			-3.12676	4.55922	1.52734	7.60643	-2.04285	-3.65636	3.75666	4.8552					15.3923	27.7312	24.9163	26.9898	19.9855	21.6089	24.6149	28.2809	26.7326
5	43.6753	38.5834	37.1372	48.5254	50.2531	36.4763	38.5639	42.7082	38.842	38.3436			-2.59748	5.10889	3.33529	8.88668	-1.65515	-2.28398	4.58824	6.00036					17.6812	30.2948	28.1284	29.97	22.6187	24.6795	27.7733	31.1743	29.7039
5.5	46.2954	41.4836	41.0185	50.8861	54.2723	39.2802	41.1919	46.3436	42.1706	42.7501			-1.87139	5.06593	5.80534	10.3134	-1.25357	-1.44687	4.83718	6.60553					19.8057	32.8193	29.8459	33.1782	24.8397	27.0201	29.654	33.6677	32.3244
6	48.5299	45.4252	44.7362	53.1583	57.212	42.4996	44.3377	49.7628	44.735	46.7661			-2.03125	5.50519	7.83986	11.3331	-1.02067	-0.44521	5.6138	7.31506					21.8671	35.6229	32.7935	36.5318	28.1087	30.3596	31.3091	35.9549	34.7922
6.5	51.3642	47.9459	48.6007	55.0102	59.3223	44.9468	45.5765	53.0513	47.5654	50.6564			-1.33754	6.03029	10.5015	11.843	-1.37039	-0.22791	6.19349	7.539					24.6647	38.0261	35.3775	39.5282	31.0649	33.7591	33.8853	39.0488	38.0271
7	53.4002	51.0032	52.0747	57.7926	61.9654	47.6067	48.4366	56.8548	50.2524	54.5842			-0.53833	6.05154	12.9507	13.3155	-1.8757	0.604816	6.79643	8.19663					27.1173	41.164	38.4208	43.0226	34.264	37.2249	36.2615	41.2485	40.2454
7.5	55.6277	53.9568	55.0811	59.9407	64.2425	49.4745	50.9961	60.3667	52.6211	57.911			0.088067	6.00153	15.8027	14.6788	-1.79876	1.23913	7.63655	9.17813					29.7954	43.7278	40.5867	46.161	36.9054	39.9211	38.5305	43.8319	42.987
8	57.9758	56.3913	58.6161	62.3156	67.047	51.0301	53.0759	62.865	55.4356	61.5756			1.1014	5.9487	18.0406	16.5036	-2.50566	2.54948	8.6414	10.0592					32.2544	46.3399	42.8968	48.5703	40.1047	43.2351	41.2192	46.6506	45.7639
