# Supplementary material for: Rapid translocation of NGR proteins driving polarization of PIN-activating D6 protein kinase during root gravitropism
Source: eLife. 2024 Mar 5;12:RP91523. doi: 10.7554/eLife.91523 (PMC10942638; doi:10.7554/eLife.91523)
Supplement: Figure 4—source data 1. [file elife-91523-fig4-data1.xlsx]

## Sheet: Fig4D
	mCH-D6PK in WT										mCH-D6PK inngr1/2/3
0
0.5									1		1	1	1	1	1	1	1	1	1
1	1	1	1	1					1.09926		0.968836	0.981466	1.00977	0.969398	0.981979	0.971663	1.06024	0.984916	0.989268
1.5	0.953015	1.00259	1.07495	0.939847					1.07774		0.960484	0.976615	1.0263	0.962039	1.00165	1.02355	1.02243	1.02958	0.982155
2	0.936411	1.08395	0.996945	1.054	1	1	1	1	0.995363		0.952944	0.9466	1.02906	0.943774	1.0287	0.968707	1.07116	1.01188	0.978251
2.5	0.891941	1.11552	1.0309	1.07973	1.06903	0.923334	0.807601	0.942616	1.05625		0.956971	0.975383	1.02583	0.949301	1.06893	1.01857	0.999842	1.03523	0.976441
3	0.843349	1.22207	0.959861	1.02372	1.06383	0.901358	0.873586	0.805898	1.08035		0.926819	0.961958	1.00637	0.934344	1.02321	1.09159	1.05522	1.06186	0.973517
3.5	0.897706	1.26654	0.997265	1.10739	1.05673	0.903577	0.861533	0.790059	1.10852		0.919379	0.940421	1.00041	0.893744	0.988196	1.06236	1.06192	1.08312	0.973011
4	0.925405	1.24059	0.997589	1.07706	1.09953	0.94022	0.986303	0.949743	1.18185		0.888954	0.927135	0.985057	0.887584	0.991724	1.01691	1.066	1.04884	0.972152
4.5	0.941239	1.39495	1.06859	1.07656	1.18523	1.03652	1.1869	0.835381	1.1267		0.880451	0.907211	1.0103	0.888855	1.01346	1.04476	1.09946	1.03901	0.973312
5	0.951643	1.4693	1.09466	1.15191	1.44657	1.32055	1.40306	1.19798	1.06737		0.860101	0.907314	1.00127	0.856453	0.962127	0.987579	1.10437	1.00145	0.972059
5.5	0.988572	1.55896	1.0696	1.17715	1.58404	1.50368	1.51921	1.31617	0.858163		0.858086	0.910556	1.00669	0.835251	0.996952	0.962935	1.10312	0.974469	0.97247
6	1.11843	1.51381	1.14633	1.16583	1.80291	1.69502	1.52783	1.35653	0.899781		0.85682	0.909398	0.958988	0.836171	1.02281	0.946598	1.07162	0.982257	0.973968
6.5	1.20119	1.54351	1.26158	1.19523	1.81381	1.77689	1.71221	1.33885	0.965967		0.865232	0.893029	1.00041	0.820066	1.02401	0.954597	1.03395	0.970818	0.975707
7	1.21048	1.43835	1.25169	1.31939	2.01276	1.69005	2.07285	1.38452	0.898288		0.847194	0.888595	0.970574	0.804147	0.977295	0.915885	1.01196	0.928867	0.974758
7.5	1.202	1.46477	1.12766	1.15731	2.13971	1.71937	1.79001	1.45921	1.05384		0.850058	0.88956	0.965547	0.794197	1.01289	0.867214	1.01202	0.872614	0.976484
8	1.07621	1.36384	1.17908	1.19444	1.92412	1.74604	1.99905	1.44147	0.9224		0.828812	0.864862	0.952084	0.760336	1.07234	0.875854	1.03408	0.88355	0.976992
8.5	1.06426	1.35918	0.966559	1.03976	1.76411	1.63059	1.4976	1.49962	1.04279		0.822193	0.841013	0.949628	0.762497	1.05003	0.831355	1.00972	0.860734	0.977213
9	1.00571	1.14382	0.870608	0.973727	1.83167	1.47482	1.69478	1.37042	1.03074		0.831978	0.837081	0.92126	0.756674	1.06666	0.849277	0.967258	0.860251	0.977514
9.5	0.882343	1.08248	0.762591	1.04421	1.76047	1.38114	1.75972	1.25656	1.12672		0.83884	0.84527	0.936774	0.765972	0.960258	0.826334	0.967841	0.84254	0.977639
10	0.804221	0.915116	0.810663	0.868236	1.65907	1.48718	1.80478	1.25059	1.21617		0.811979	0.824445	0.921299	0.775821	0.985344	0.822384	0.980922	0.858315	0.977517
10.5	0.710802	0.874875	0.882234	0.727544	1.6127	1.47039	1.73356	1.34418	1.18809		0.794037	0.808459	0.89005	0.746077	0.953088	0.815341	0.943175	0.823255	0.977274
11	0.659621	0.870235	0.824244	0.687603	1.46038	1.28527	1.47323	1.16125	1.40133		0.810744	0.82328	0.899001	0.747941	0.924675	0.799853	0.877699	0.828281	0.980952
11.5	0.628841	0.811002	0.725877	0.670948	1.25662	1.16194	1.29957	1.1221	1.30597		0.795193	0.822349	0.902783	0.728081	0.89878	0.762793	0.844947	0.789081	0.981621
12	0.626249	0.828548	0.761879	0.584481	1.19237	1.12579	1.51292	1.00153	1.24444		0.791224	0.8107	0.895644	0.760832	0.921834	0.783516	0.858118	0.800773	0.983561
12.5	0.517375	0.818568	0.740046	0.58159	1.13454	1.08846	1.28978	1.08505	1.44088		0.705112	0.818877	0.892652	0.753074	0.882349	0.789781	0.84359	0.813278	0.983619
13	0.537994	0.741347	0.721897	0.557972	1.05885	1.09391	1.28556	1.00449	1.58612			0.836516	0.840673	0.745807	0.861047	0.755997	0.813742	0.78278	0.981886
13.5	0.524084	0.724896	0.78171	0.587253	0.916481	0.896366	1.0903	0.785982	1.6283			0.799428	0.890191	0.717831	0.827167	0.737292	0.769268	0.75895	0.984758
14	0.465231	0.758608	0.830572	0.485966	0.821579	1.01956	1.1386	0.890346	1.68899			0.801659	0.867742	0.710572					0.985696
14.5	0.546609	0.807303	0.860499	0.59123					1.87626			0.787541							0.987325
15	0.638175	0.812339	0.896003	0.61481					1.96751										0.98855
									1.84664										0.990714
									1.6847										0.990349
									1.7935										0.993316
									1.70416										0.992996
									1.67421										0.994544
									1.69485										0.993785
									1.76165										0.996043
									1.79863
									1.81665
									1.22609
